# Supplementary material
Source: Research Square preprint supplement (doi:10.21203/rs.3.rs-9293985/v1)
Supplement: Supplementary file 1 [file cca177a98371fedef97a7f73.docx]

**Supplementary Information**

**Yolk-Shell Zeolite Nanoreactors Enable Multi‑Poison Resistance for NOx Reduction**

Yonglong Li,a, b‡ Guobo Li,a‡ Rongxing Li,a Jian Ji,a Xiaonan Hu,a Fengbo Yu,a Wenming Liu,c Hongmei Li,d Min Liu,d, e and Honggen Penga, c*

a*Engineering Research Center of Watershed Carbon Neutrality of Ministry of Education and School of Resources and Environment, Nanchang University, Nanchang, Jiangxi, 330031, China*

b *School of Life Sciences, Jinggangshan University, Ji’an, Jiangxi, 343009, China*

c *School of Chemistry and Chemical Engineering, Nanchang University, Nanchang, Jiangxi, 330031, China*

d *Hunan Joint International Research Center for Carbon Dioxide Resource Utilization, State Key Laboratory of Powder Metallurgy, School of Physics, Central South University, Changsha, Hunan, 410083, China*

e *School of Metallurgy and Environment, Central South University, Changsha, Hunan, 410083, China*

‡ *These authors contributed equally to this work.*

* Corresponding author, E-mail: [*penghonggen@ncu.edu.cn*](mailto:penghonggen@ncu.edu.cn)(H.G. Peng)

(This Supplementary Information includes **89 pages**, **61 figures**, and **7 tables**)

**List of Content**

[Supplementary Experimental Details 1](#_Toc213266183)

[Catalyst preparation 1](#_Toc213266184)

[Catalytic test 5](#_Toc213266185)

[Kinetic test 5](#_Toc213266186)

[Catalyst characterization 7](#_Toc213266187)

[DFT calculation 9](#_Toc213266188)

[Supplementary Figures 11](#_Toc213266189)

[Figure S1. SEM images of the ZSM-5 zeolite. 11](#_Toc213266190)

[Figure S2. TEM images of the ZSM-5 zeolite. 12](#_Toc213266191)

[Figure S3. SEM images of the supported MnFeOx/ZSM-5 sample. 13](#_Toc213266192)

[Figure S4. (A, B) TEM images, (C) HAADF-TEM image and (D–I) EDS elemental mappings of the supported MnFeOx/ZSM-5 sample. 14](#_Toc213266193)

[Figure S5. SEM images of the yolk-shell structured MnFeOx@YS-ZSM-5 nanoreactor. 15](#_Toc213266194)

[Figure S6. TEM images of the yolk-shell structured MnFeOx@YS-ZSM-5 nanoreactor. 16](#_Toc213266195)

[Figure S7. (A, B) HAADF-STEM, (C–H) EDS elemental mappings, and (I) line scan of the yolk-shell structured MnFeOx@YS-ZSM-5 nanoreactor. 17](#_Toc213266196)

[Figure S8. (A–E) iDPC images and (F) selected area electron diffraction (SAED) of the yolk-shell structured MnFeOx@YS-ZSM-5 nanoreactor. 18](#_Toc213266197)

[Figure S9. Pore-size distributions of ZSM-5 zeolite and yolk-shell structured MnFeOx@YS-ZSM-5 samples derived from the isotherms. 19](#_Toc213266198)

[Figure S10. Powder XRD patterns of as-prepared ZSM-5, S-1, MnFeOx, MnFeOx/ZSM-5, MnFeOx/S-1, and MnFeOx@YS-ZSM-5 samples. 20](#_Toc213266199)

[Figure S11. (A, B) TEM, (C) HAADF-STEM, and (D) EDS elemental mappings of MnFeOx@YS-ZSM-5 sample obtained after being hydrothermally treated in TPAOH solution at 170 °C for 1 h. 21](#_Toc213266200)

[Figure S12. (A, B) TEM, (C) HAADF-STEM, and (D) EDS elemental mappings of the MnFeOx@YS-ZSM-5 sample obtained after being hydrothermally treated in TPAOH solution at 170 °C for 2 h. 22](#_Toc213266201)

[Figure S13. (A, B) TEM, (C) HAADF-STEM, and (D) EDS elemental mappings of the MnFeOx@YS-ZSM-5 sample obtained after being hydrothermally treated in TPAOH solution at 170 °C for 4 h. 23](#_Toc213266203)

[Figure S14. (A, B) TEM, (C) HAADF-STEM, and (D) EDS elemental mappings of the MnFeOx@YS-ZSM-5 sample obtained after being hydrothermally treated in TPAOH solution at 170 °C for 8 h. 24](#_Toc213266204)

[Figure S15. (A, B) TEM, (C) HAADF-STEM, and (D) EDS elemental mappings of the MnFeOx@YS-ZSM-5 sample obtained after being hydrothermally treated in TPAOH solution at 170 °C for 12 h. 25](#_Toc213266205)

[Figure S16. (A, B) TEM, (C) HAADF-STEM, and (D) EDS elemental mappings of the MnFeOx@YS-ZSM-5 sample obtained after being hydrothermally treated in TPAOH solution at 170 °C for 24 h. 26](#_Toc213266206)

[Figure S17. (A, B) TEM, (C) HAADF-STEM, and (D) EDS elemental mappings of the MnFeOx@YS-ZSM-5 sample obtained after being hydrothermally treated in TPAOH solution at 170 °C for 48 h. 27](#_Toc213266207)

[Figure S18. N2 adsorption-desorption isotherms of MnFeOx@YS-ZSM-5 obtained after being hydrothermally treated in TPAOH solution at 170 °C with varying durations. 28](#_Toc213266208)

[Figure S19. Powder XRD patterns of MnFeOx@YS-ZSM-5 obtained after being hydrothermally treated in TPAOH solution at 170 °C with varying durations. 29](#_Toc213266209)

[Figure S20. Si 2p and Al 2p XPS spectra of the supported MnFeOx/ZSM-5 and yolk-shell structured MnFeOx@YS-ZSM-5 samples 30](#_Toc213266210)

[Figure S21. Formation mechanism of yolk-shell structured MnFeOx@YS-ZSM-5 nanoreactor. 31](#_Toc213266211)

[Figure S22. (A–C) TEM images, (D) HAADF-STEM, and (E, F) EDS elemental mappings of the yolk-shell structured MnCoOx@YS-ZSM-5 nanoreactor. 33](#_Toc213266212)

[Figure S23. (A, B) TEM images, (C) HAADF-STEM, and (D) EDS elemental mappings of the yolk-shell structured MnCeOx@YS-ZSM-5 nanoreactor. 34](#_Toc213266213)

[Figure S24. N2 adsorption-desorption isotherms of supported MnCoOx/ZSM-5 and yolk-shell structured MnCoOx@YS-ZSM-5 nanoreactor. 35](#_Toc213266214)

[Figure S25. N2 adsorption-desorption isotherms of supported MnCeOx/ZSM-5 and yolk-shell structured MnCeOx@YS-ZSM-5 nanoreactor. 36](#_Toc213266215)

[Figure S26. Powder XRD patterns of yolk-shell structured MnCoOx@YS-ZSM-5 and MnCeOx@ZSM-5 nanoreactors. 37](#_Toc213266216)

[Figure S27. SEM images of the pure MnFeOx metal oxides sample. 38](#_Toc213266217)

[Figure S28. TEM images of the MnFeOx metal oxides sample. 39](#_Toc213266218)

[Figure S29. TEM images of the S-1 zeolite. 40](#_Toc213266219)

[Figure S30. TEM images of the supported MnFeOx/S-1 sample. 41](#_Toc213266220)

[Figure S31. (A–C) TEM images, (D) HAADF-STEM, and (E–I) EDS elemental mappings of the supported MnFeOx/S-1 sample. 42](#_Toc213266221)

[Figure S32. N2 adsorption-desorption isotherms of the pure MnFeOx, S-1 zeolite, and supported MnFeOx/S-1 samples. 43](#_Toc213266222)

[Figure S33. N2O concentration as a function of temperature in NH3-SCR reaction over the MnFeOx, MnFeOx/ZSM-5, MnFeOx/S-1 and yolk-shell structured MnFeOx@YS-ZSM-5 catalysts.. 44](#_Toc213266223)

[Figure S34. N2 selectivity as a function of temperature in NH3-SCR reaction over the MnFeOx, MnFeOx/ZSM-5, MnFeOx/S-1 and yolk-shell structured MnFeOx@YS-ZSM-5 catalysts.. 45](#_Toc213266224)

[Figure S35. NOx conversion as a function of temperature in NH3-SCR reaction over the MnFeOx@YS-ZSM-5 obtained after being hydrothermally treated in TPAOH solution at 170 °C with varying durations. 46](#_Toc213266225)

[Figure S36. The active temperature windows (NOx conversion higher than 80%) of the MnFeOx-based NH3-SCR catalysts reported in the literature. 47](#_Toc213266226)

[Figure S37. Arrhenius plots of NOx conversions in SCR over the over the MnFeOx, MnFeOx/ZSM-5, MnFeOx/S-1 and MnFeOx@YS-ZSM-5 catalysts.. 48](#_Toc213266227)

[Figure S38. NOx conversion as a function of temperature in NH3-SCR reaction over the SO2-MnFeOx@YS-ZSM-5 and SO2-MnFeOx/ZSM-5 samples. 49](#_Toc213266228)

[Figure S39. TEM images of the (A, B) hollow ZSM-5 zeolite and (C, D) supported MnFeOx/Hollow-ZSM-5 sample. 50](#_Toc213266229)

[Figure S40. N2 adsorption-desorption isotherms of the hollow ZSM-5 zeolite and supported MnFeOx/Hollow-ZSM-5 samples. 51](#_Toc213266230)

[Figure S41. NOx conversion as a function of temperature in NH3-SCR reaction over the S-1 zeolite, ZSM-5 zeolite, and supported MnFeOx/Hollow-ZSM-5 samples.. 52](#_Toc213266231)

[Figure S42. SO2 resistance performance over the supported MnFeOx/Hollow-ZSM-5 and yolk-shell structured MnFeOx@YS-ZSM-5 catalysts at 246 °C.. 53](#_Toc213266232)

[Figure S43. NOx conversion as a function of temperature in NH3-SCR reaction over the K-MnFeOx/ZSM-5 and MnFeOx/ZSM-5 catalysts.. 54](#_Toc213266233)

[Figure S44. NOx conversion as a function of temperature in NH3-SCR reaction over the K-MnFeOx/S-1 and MnFeOx/S-1 catalysts.. 55](#_Toc213266234)

[Figure S45. NOx conversion as a function of temperature in NH3-SCR reaction over the K-MnFeOx/ZSM-5 and K-MnFeOx@YS-ZSM-5 catalysts under the 50 ppm SO2 atmosphere.. 56](#_Toc213266235)

[Figure S46. NH3-TPD curves over the fresh S-1 zeolite, ZSM-5 zeolite, pure MnFeOx, MnFeOx/ZSM-5, MnFeOx/S-1, and yolk-shell structured MnFeOx@YS-ZSM-5 samples. 57](#_Toc213266236)

[Figure S47. Py-IR spectra over the fresh ZSM-5 zeolite, supported MnFeOx/ZSM-5, yolk-shell structured MnFeOx@YS-ZSM-5, and related K-poisoning samples at 260 °C. 59](#_Toc213266237)

[Figure S48. NH3-TPD curves of the K-poisoned catalysts. 60](#_Toc213266238)

[Figure S49. H2-TPR profiles over the K-poisoned catalysts. 61](#_Toc213266239)

[Figure S50. Mn 2p XPS spectra of pure MnFeOx and S-MnFeOxsamples. 62](#_Toc213266240)

[Figure S51. SO2-TPD curves over the MnFeOx, MnFeOx/ZSM-5, and yolk-shell structured MnFeOx@YS-ZSM-5 samples. 63](#_Toc213266241)

[Figure S52. Mn 2p XPS spectra of the K-poisoned catalysts. 64](#_Toc213266242)

[Figure S53. *In situ* DRIFT spectra of NH3 adsorption over pure MnFeOx catalyst at 200 °C. 65](#_Toc213266243)

[Figure S54. *In situ* DRIFT spectra of pre-adsorbed NH3 species reacted with NO + O2 over the pure MnFeOx catalyst at 200 °C. 66](#_Toc213266244)

[Figure S55. *In situ* DRIFT spectra of NO + O2 adsorption over the pure MnFeOx catalyst at 200 °C. 67](#_Toc213266245)

[Figure S56. *In situ* DRIFT spectra of pre-adsorbed NO + O2 species reacted with NH3 over the pure MnFeOx catalyst at 200 °C. 68](#_Toc213266246)

[Figure S57. NO-TPD curves of the pure MnFeOx and yolk-shell structured MnFeOx@YS-ZSM-5 samples. 69](#_Toc213266247)

[Figure S58. Top view and side view of optimized MnFeOx structure. 70](#_Toc213266248)

[Figure S59. Top view and side view of optimized MnFeOx@YS-ZSM-5 structure. 71](#_Toc213266249)

[Figure S60. Optimized adsorption configurations of SO2 gas molecules on Brønsted acid sites in ZSM-5 zeolite structure. 72](#_Toc213266250)

[Figure S61. *In situ* Mn *K*-edge XANES spectra of the transient reaction over the yolk-shell structured MnFeOx@YS-ZSM-5 catalyst after 0, 2 and 3 h treatment at 246 °C in an atmosphere of 250 ppm SO2 + 5 vol.% O2. 73](#_Toc213266251)

[Supplementary Tables 74](#_Toc213266252)

[Table S1. Specific surface area and pore volume of the samples. 74](#_Toc213266253)

[Table S2. Comparison with literature about the performances of MnFeOx-based catalysts for NH3-SCR. 75](#_Toc213266254)

[Table S3. The *CM* over the various catalysts in NH3-SCR performance. 76](#_Toc213266255)

[Table S4. The *CWP* over the various catalysts in NH3-SCR performance. 77](#_Toc213266256)

[Table S5. The *CMe.* over the various catalysts in NH3-SCR performance. 78](#_Toc213266257)

[Table S6. The acidic properties of the fresh MnFeOx, MnFeOx/ZSM-5, MnFeOx/S-1, MnFeOx@YS-ZSM-5, and related K-poisoned catalysts. 79](#_Toc213266258)

[Table S7. Surface component of different species from XPS data over different samples. 80](#_Toc213266259)

[Supplementary References 81](#_Toc213266260)

**Supplementary Experimental Details**

**Catalyst preparation**

The ZSM-5 zeolite (Si/Al = 100) was synthesized using a hydrothermal method. Tetrapropylammonium hydroxide (TPAOH, 25%), tetraethoxysilane (TEOS, AR), and aluminum isopropoxide (98%) were used as the starting materials. Initially, 90.7 mL of TPAOH was combined with 94.5 mL of TEOS, and the resulting mixture was stirred at 35 °C for 3 h. A stoichiometric quantity of aluminum isopropoxide was then dissolved in 209 mL of water, and the resulting suspension was stirred at 85 °C for 3 h. Following this, the aluminum isopropoxide solution was added dropwise to the TPAOH-TEOS mixture. The combined solution was stirred at 35 °C for 3 h, then heated at 85 °C for an additional hour to remove the alcohols formed during the hydrolysis of aluminum isopropoxide and TEOS. Water was subsequently added to adjust the volume, and the mixed solution underwent hydrothermal treatment at 170 °C for 72 h. The product was then washed with water, dried at 110 °C for 12 h, and calcined at 540 °C for 6 h (2 °C min−1).

The supported MnFeOx/ZSM-5 catalyst was prepared via an impregnation method. FeCl3·6H2O and MnCl2·4H2O served as the precursors. The total MnO2 and Fe2O3 active components constituted 15% with a Mn/Fe molar ratio of 1:1. Initially, add appropriate amounts of the two metal precursors to 20 ml of ethanol solution, stir to dissolve, then add 2.0 g of ZSM-5 zeolite and continue stirring at room temperature for 12 h. Following this, the mixture was dried under stirring at 50 °C for 20 h. Finally, the resulting yellow powder was calcined at 500 °C for 4 h (2 °C min−1). It should be noted that the sample calcined once for 4 h was only used for the subsequent preparation of yolk-shell nanoreactors. Since the complete fabrication process of the yolk-shell nanoreactors described below involves two consecutive calcinations at 500 °C for 4 h each, to ensure the consistency of catalyst calcination conditions and the comparability of experiments, various supported catalysts (including MnFeOx/ZSM-5, MnFeOx/S-1, and MnFeOx/Hollow-ZSM-5 below) subjected to two calcinations at 500 °C for 4 h were also prepared in parallel for all performance tests and characterization analyses.

The yolk-shell structured MnFeOx@YS-ZSM-5 nanoreactor was synthesized by treating the MnFeOx/ZSM-5 catalyst with an aqueous TPAOH solution. In the first step, 8.03 mL of TPAOH was mixed with 25.1 mL of water. Next, 1.66 g of MnFeOx/ZSM-5 was introduced into the aqueous solution. The resulting mixture was then hydrothermally processed at 170 °C for 72 h. The product was washed with water, dried at 80 °C for 10 h, and subsequently calcined at 500 °C for 4 h (2 °C min−1). The actual total MnO2 and Fe2O3 content in the sample, determined by ICP, was approximately 15 wt.%.

The pure MnFeOx metal oxides catalysts with a Mn/Fe molar ratio of 1:1 was synthesized using the co-precipitation method. Typically, moderate MnCl2·4H2O and FeCl3·6H2O were first dissolved in distilled water. After 3 h of stirring, diluted ammonia solution was slowly added to the above mixed solution under vigorous stirring until the pH was approximately 10. After stirring for 5 h, then the obtained suspension was filtered and washed with deionized water and ethanol several times. Finally, the precipitate was dried at 80 °C for 12 h and subsequently calcined, the calcination procedures were identical to that used for the preparation MnFeOx@YS-ZSM-5 nanoreactor.

The preparation method of the S-1 zeolite was the same as that of the ZSM-5 zeolite, except that aluminum isopropoxide was not added during the preparation process. The preparation method of the hollow ZSM-5 zeolite was consistent with that of the MnFeOx@YS-ZSM-5 nanoreactor, except that ZSM-5 was used instead of MnFeOx/ZSM-5 for the TPAOH hydrothermal treatment. The supported MnFeOx/S-1 and MnFeOx/Hollow-ZSM-5 catalysts were prepared in the same method as the MnFeOx/ZSM-5 catalyst, both by the impregnation method, and only the supports need to be changed.

The K-poisoning catalysts were obtained by wet impregnation method. Typically, fresh catalysts were added to an aqueous KNO3 solution and stirred at 35 °C for 30 min. Subsequently, the mixture was stirred at 80 °C to evaporate the water to dryness. The dried powder was placed in a muffle furnace and calcined at 500 °C for 30 min (heating rate was 5 °C min−1), yielding K-poisoned samples with a 0.5 wt.% K2O loading. Catalysts after K poisoning were named with “K-” as the prefix, such as K-MnFeOx@YS-ZSM-5.

To evaluate the SO2 poisoning resistance of the catalysts, the long-term stability tests for SO2 poisoning resistance was performed on the catalysts under the following conditions: at 246 °C, 100 mg of fresh catalyst was first exposed to NH3-SCR reaction gas (500 ppm NO, 500 ppm NH3, 5 vol.% H2O, 5 vol.% O2, with N2 as the balance gas, total gas flow rate was controlled at 100 mL min−1) for 1.5 h. Subsequently, SO2 was introduced into the system (with a concentration of 50 ppm in the mixed gas), and the reaction was maintained stably for an additional 7.5 h. Thereafter, SO2 was removed, allowing the catalyst to continue reacting in SO2-free NH3-SCR reaction gas for a further 10.5 h. The SO2-poisoned catalyst obtained after the entire test was designated with the prefix “S-”, such as S-MnFeOx@YS-ZSM-5. Furthermore, SO2 pre-sulfation treatments were also carried on the catalysts. The detailed procedure is as follows: 100 mg of fresh catalyst was loaded into a quartz tube and fed with a pretreatment gas (gas composition: 50 ppm SO2, 500 ppm NO, 500 ppm NH3, 5 vol.% H2O, 5 vol.% O2, with N2 as the balance gas), and the total gas flow rate was controlled at 100 mL min−1. The pre-sulfation treatment was conducted at 200 °C for 3 h. After the pre-sulfation treatment, all gases were immediately shut off, and the catalyst was cooled to room temperature before testing its NH3-SCR catalytic activity. Catalysts subjected to SO2 pre-sulfation treatment were named with “SO2-” as the prefix, such as SO2-MnFeOx@YS-ZSM-5.

To investigate the universality of the impregnation-dissolution-recrystallization (IDR) method for preparing yolk-shell structured nanoreactor materials, supported MnCoOx/ZSM-5 and MnCeOx/ZSM-5 samples were prepared, as well as the corresponding yolk-shell structured MnCoOx@YS-ZSM-5 and MnCeOx@YS-ZSM-5 nanoreactor materials, following the same experimental procedures. For reagent usage, the Mn source remained unchanged, while the Co source employed was CoCl2·6H2O and the Ce source was CeCl3·7H2O.

**Catalytic test**

NH3-SCR performances were conducted through the use of a fixed-bed quartz flow reactor (with an inner diameter of 6 mm). The gas mixture comprised 500 ppm of NO, 500 ppm of NH3, 5 vol. % O2, 5 vol. % H2Oand N2 as the balance gas, maintaining a total flow rate of 100 mL min−1. 100 mg of catalyst (40–60 mesh) was used for each NH3-SCR test, this arrangement led to a weight hourly space velocity (WHSV) of 60,000 mL gcat.−1 h−1. The assessment of catalytic activity involved ramping up the fixed-bed temperature at a rate of 2 °C min−1. The composition and concentration of the outlet gases were continuously monitored using Fourier transform infrared (FT-IR) spectroscopy with an Antaris IGS-Gas Analyzer (Thermo Fisher Scientific Inc., Waltham, MA, USA) equipped with a 2-meter gas cell. NOx conversion and N2 selectivity were figured out using the given equations:

NOx conversion () and N2 selectivity () were then calculated using the following equations:

where , , , , and are the relative gas concentrations at the input and output, respectively.

**Kinetic test**

In the investigation of NH3-SCR kinetics over MnFeOx, MnFeOx/S-1, MnFeOx/ZSM-5, and MnFeOx@YS-ZSM-5 catalysts, a fixed-bed quartz reactor was employed. Within a quartz tube of 6 mm inner diameter, 25 mg of catalyst (40–60 mesh) and 75 mg of inert quartz sand were packed. Although maintaining the same composition and concentration of reaction gases as NH3-SCR, the total flow rate was adjusted to 350 mL min−1, thereby fixing the WHSV at 840,000 mL gcat.−1 h−1 and ensuring NOx conversion rates remained below 18%. The low NOx conversion and the absence of mass and heat transfer limitations confirm the occurrence of the reaction in the kinetic region. To further corroborate this, calculations of the Weisz-Prater criterion and the Mears criterion were undertaken[1,2], systematically excluding the influences of mass transport and heat transfer limitations, respectively. The determination of reaction rate (, in mol gcat.−1 s−1), reaction rate coefficient (, in mol gcat.−1 s−1)and apparent activation energy (, in kJ mol−1) for the NH3-SCR kinetic reactions involves conducting experiments at varying temperatures to derive the NOx conversion using the following formulas:

Here, represents the gas flow rate (in mol s−1) of NOx, is the mass of the catalyst (in g), is the pre-exponential factor, is the reaction temperature (in K), is the gas constant (in kJ mol−1 K−1). The reaction orders for NO and NH3 are typically set as first and zero, respectively, and the can be calculated from the Arrhenius plots of the reaction rate coefficient.

**Catalyst characterization**

X-ray diffraction (XRD) patterns were recorded on an intelligent X-ray diffractometer (SmartLab9KW) produced by Rigaku Corporation of Japan, with Cu Kα radiation (40 kV and 30 mA) from 5–80°. N2 adsorption and desorption isotherms were obtained on Kubo X1000 high-performance pore size-specific surface area analyzer (Builder, Beijing) after pretreating at 300 °C for 5 h. X-ray photoelectron spectra (XPS) were carried out on Thermo ESCALAB 250Xi system with Al Kα radiation, and the spectra was calibrated against the standardized C 1s peak at 284.8 eV. Transmission electron microscopy (TEM) and elemental mapping images were obtained using a JEOL 3000F TEM working at 300 kV equipped with an energy dispersive spectroscopy (EDS) detector. Before conducting TEM investigation, the sample needs to be sonicated in ethanol for dispersion treatment. The H2 temperature programmed reduction (H2-TPR) experiments were conducted on a PCA-1200 (Builder, Beijing) instrument. Normally, 100 mg of the catalyst underwent pretreatment in a pure He atmosphere at 300 °C for 1.5 h, followed by cooling to room temperature. Subsequently, the sample was raised to 1000 °C in a 10% H2/Ar atmosphere with a flow rate of 30 mL min−1 at a heating rate of 10 °C min−1. The instrument used for temperature-programmed desorption of NH3 (NH3-TPD) is the same as that employed in the aforementioned catalytic activity tests, namely, the Antaris IGS gas analyzer. Prior to the NH3-TPD experiments, 100 mg catalyst was pretreated under N2 protection (50 mL min−1) at 300 °C for 1 h and then cooled to 30 °C. Then, the sample was exposed to 1000 ppm NH3/N2 (50 mL min−1)for 1 h at 30 °C, the physical adsorption of ammonia was removed by N2 purging for 1 h at the same temperature. Finally, the temperature was raised to 800 °C with a ramping rate of 2 °C min−1 in N2 atmosphere (50 mL min−1), and the desorbed NH3 were detected by an Antaris IGS gas analyzer. The instrumentation and operational procedures employed for SO2-TPD and NO-TPD characterizations were identical to those used for the aforementioned NH3-TPD measurements. The sole difference was the replacement of the pre-adsorbed gas. The FTIR spectra that investigate the chemisorbed pyridine (Py-IR) were recorded on the FTIR spectrometer. Catalysts (20 mg) were pressed into a thin plate. The thin plates were heated to 350 °C for 1 h. Then, the cell was cooled to room temperature quickly by circulating water. The spectra measured at 260 °C were collected as references. When the temperature was cooled to 50 °C, the pyridine gas was filled into the cell for 30 min. The cell was pumped to vacuum for 1 h to remove the gaseous pyridine. Then, the cell was heated back to 260 °C and kept for 30 min. The FTIR spectra at this temperature are recorded. The *in situ* diffuse reflectance infrared Fourier transform spectroscopy (*in situ* DRIFTS) were acquired on an FTIR (Thermo Scientific Nicolet IS50) equipped with an MCT/A detector cooled by liquid nitrogen and an *in situ* DRIFTS reaction cell with ZnSe windows. Prior to each experiment, the sample was pretreated at 400 °C for 1.5 h with N2 flow (50 mL min−1). The reaction conditions were controlled as follows: 1000 ppm NH3, 1000 ppm NO + 5 vol% O2, N2 balance with 50 mL min−1. All spectra were recorded from 1000–4000 cm −1 in Kubelka-Munk format, accumulating 64 scans with a resolution of 4 cm−1. X-ray absorption fine structure (XAFS) spectroscopy was carried out using the Rapid XAFS 2M (Anhui Absorption Spectroscopy Analysis Instrument Co., Ltd.) by transmission (or fluorescence) mode at 10 kV and 20 mA, and the Si (553) spherically bent crystal analyzer with a radius of curvature of 500 mm was used for Mn.

**DFT calculation**

In this study, *Vienna* [*Ab Initio Simulation*](https://www.sciencedirect.com/topics/materials-science/ab-initio-simulation) *Package* (*VASP*) 5.6 was adopted for the DFT calculation[3,4]. The projector augmented wave (PAW) method and the Perdew–Burke–Ernzerhof functional were used for calculation as exchange-correlation functional[5]. The cut-off energy was set to 500 eV, and for the strong electronic correlation of transition metals and their [oxide systems](https://www.sciencedirect.com/topics/engineering/oxide-system), we used the DFT + U method to solve[6,7]. Hence, for the *d* orbitals of Mn, and Fe, a value of U = 4.5 and 4.0 eV was used[8,9], respectively. For the MnFeOx-ZSM-5 calculations, the energies are converged with (2 × 1 × 3) K points in a Monkhorst–Pack grid, (3 × 1 × 3) was adopted for MnFeOx-Fe2O3. The lowest energy structure can be determined when the change in total energy and the force acting on each ion is less than 10−5 eV and 10−3 eV Å−1, respectively. An at least 20 Å thick vacuum layer in the z–direction is added to simulate the surfaces to ensure the reaction will not be influenced by next layer.

The adsorption energies () of reaction gas on the catalyst surface were calculated by using following formula:

Where , andis the total energy of adsorbed reaction gas over the catalyst surface, interacting catalyst surface, and the isolated gas molecules in vacuum, respectively. For MnFeOx@YS-ZSM-5, MnFeOx composite metal oxide clusters are encapsulated on the (020) facets of ZSM-5 zeolite. As for MnFeOx structure, MnOx species are loaded on the Fe2O3 (104) facets.

**Supplementary Figures**


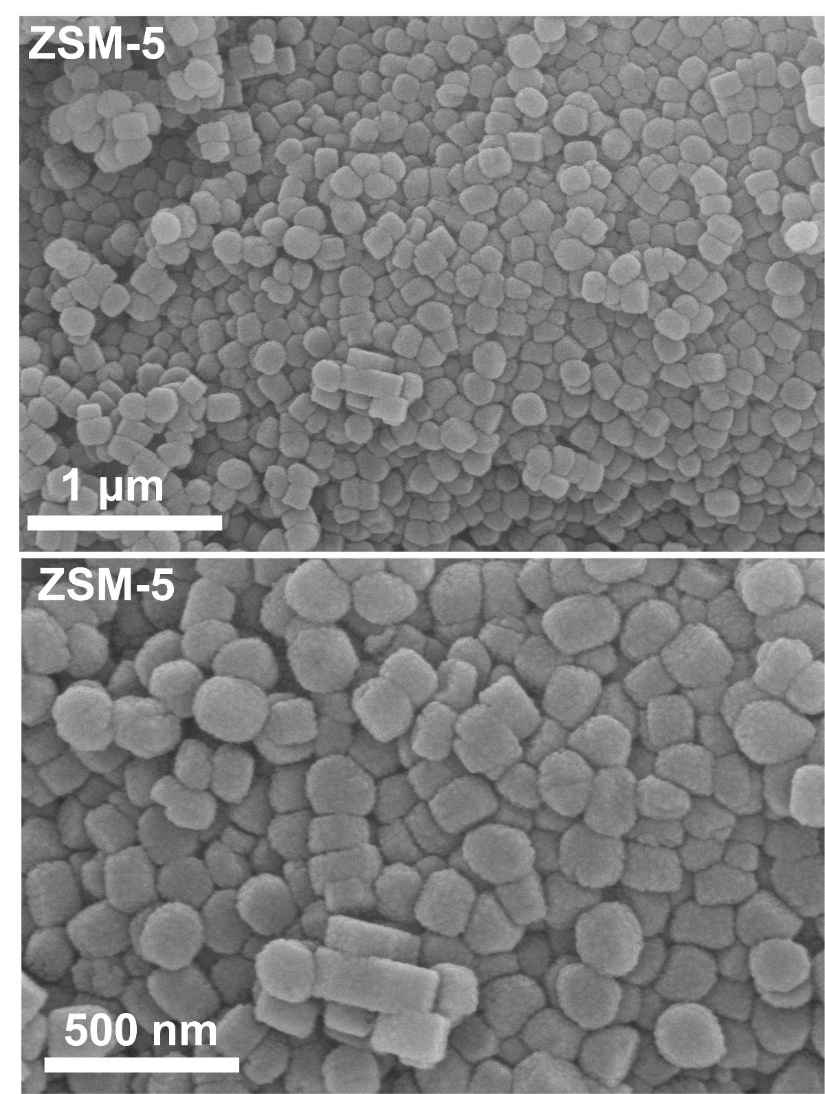


**Figure S1**. SEM images of the ZSM-5 zeolite.


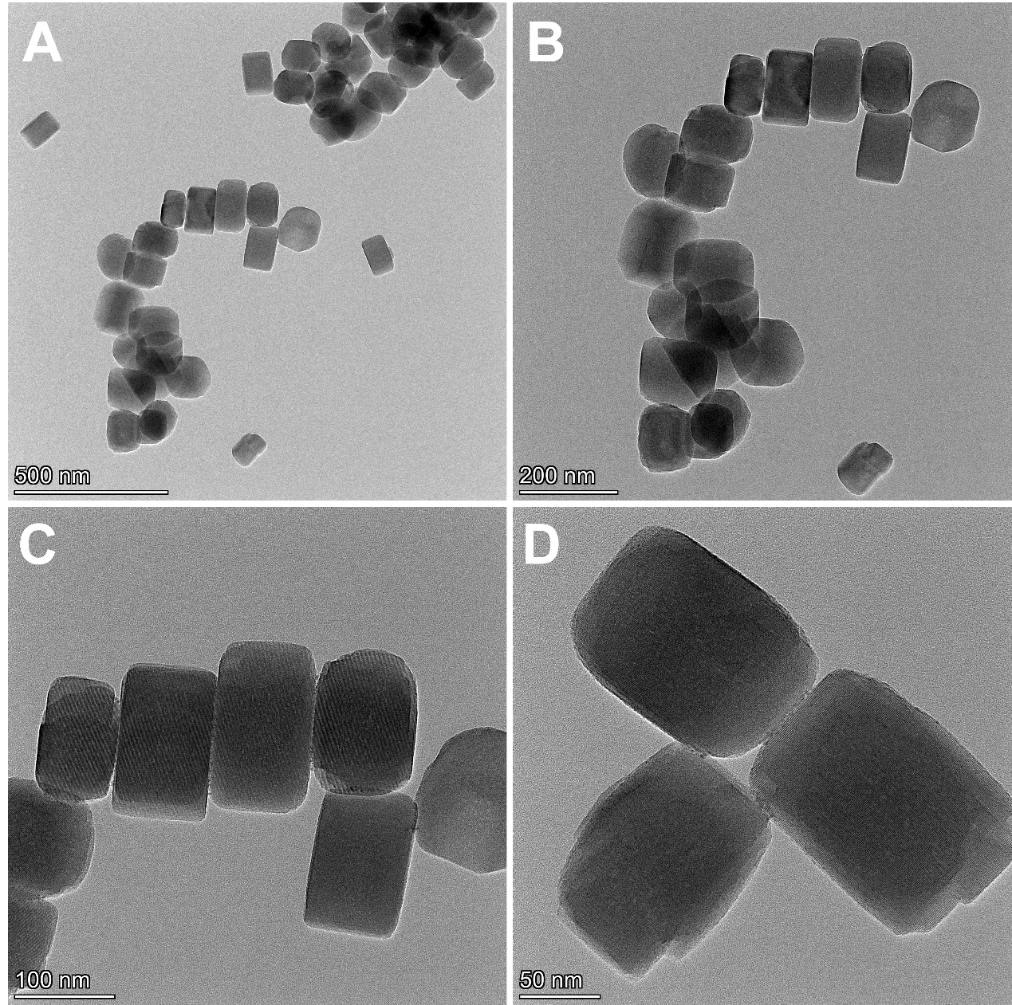


**Figure S2**. TEM images of the ZSM-5 zeolite.

**
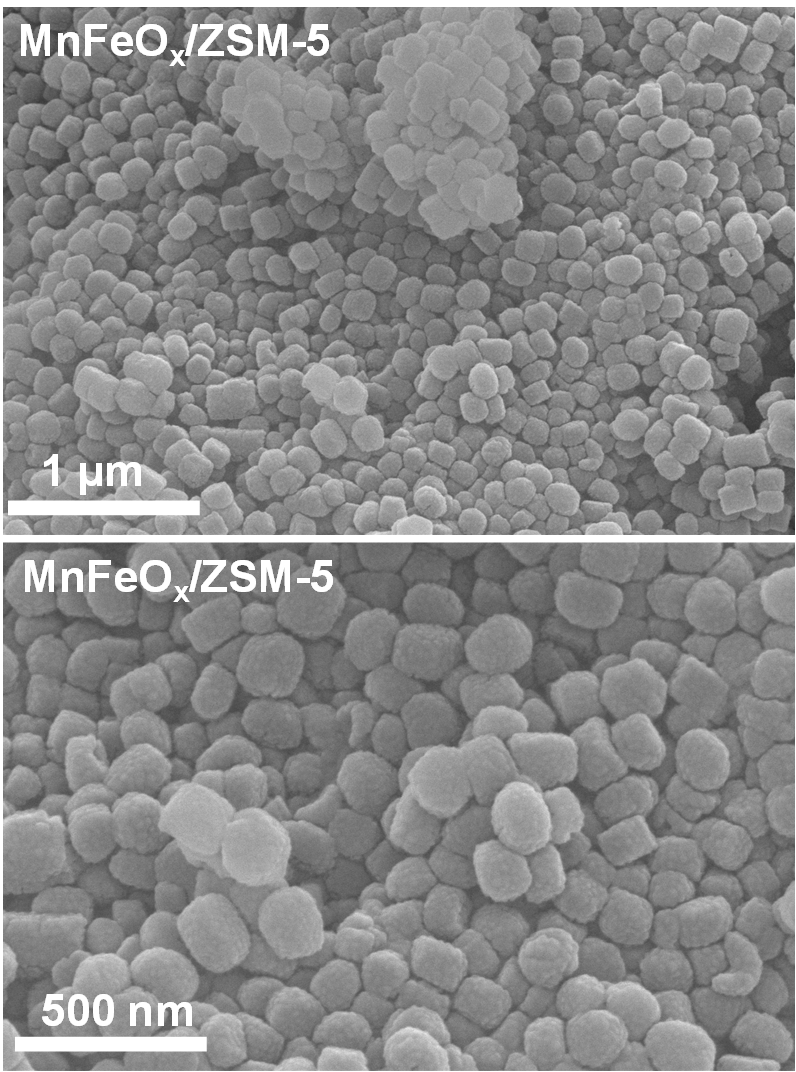
**

**Figure S3**. SEM images of the supported MnFeOx/ZSM-5 sample.

**
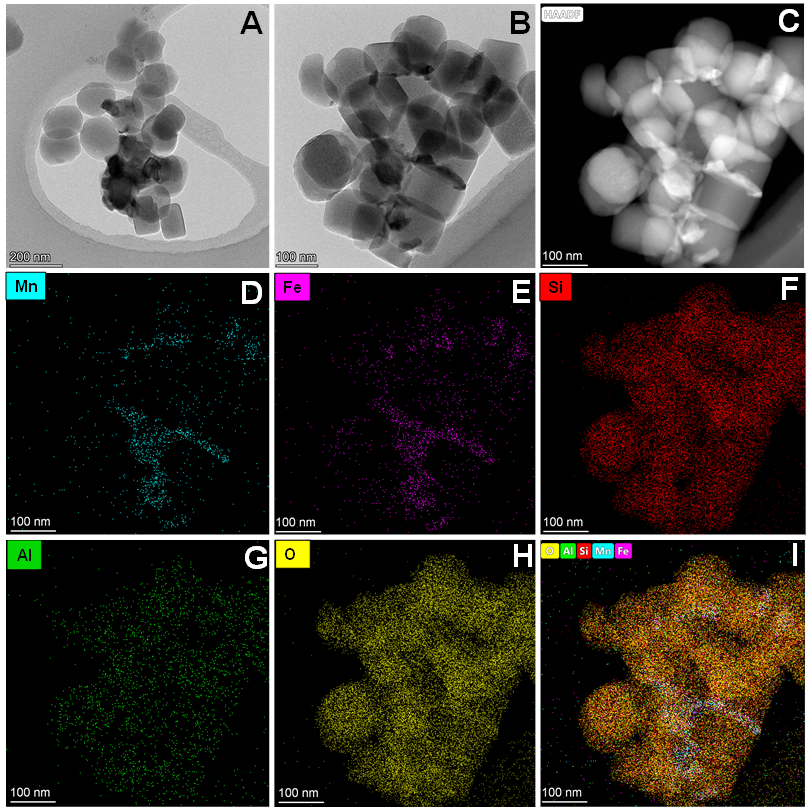
**

**Figure S4**. (A, B) TEM images, (C) HAADF-TEM image and (D–I) EDS elemental mappings of the supported MnFeOx/ZSM-5 sample.


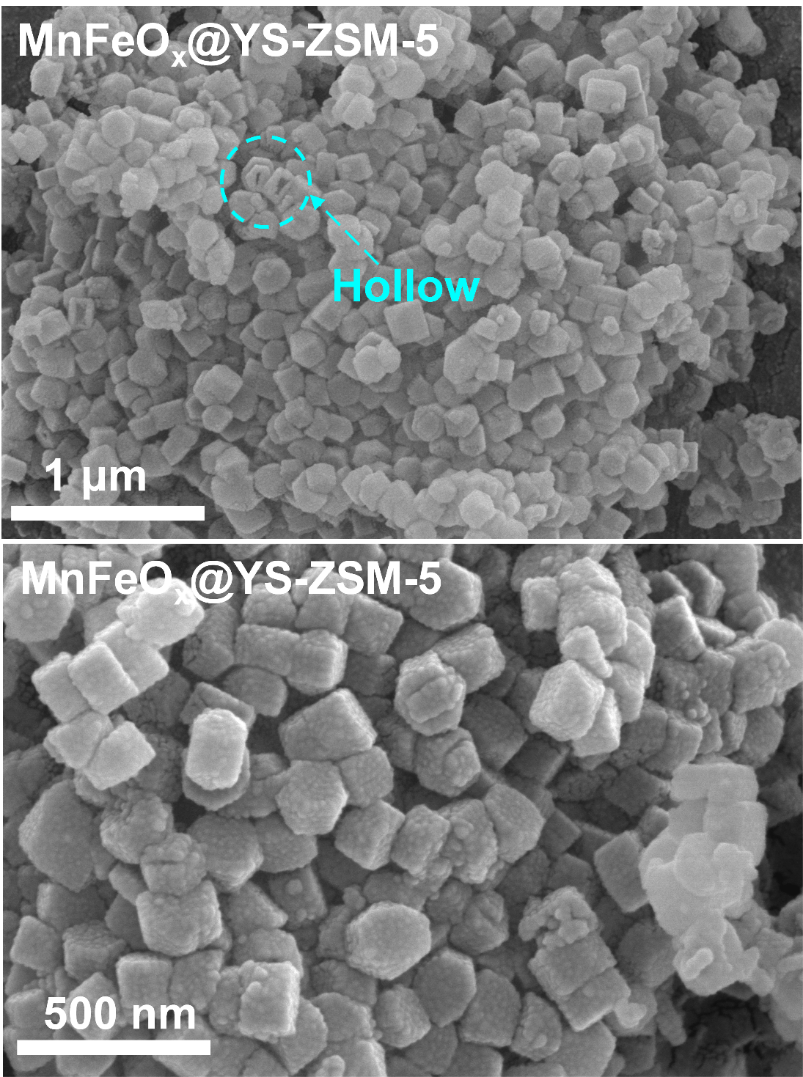


**Figure S5**. SEM images of the yolk-shell structured MnFeOx@YS-ZSM-5 nanoreactor.


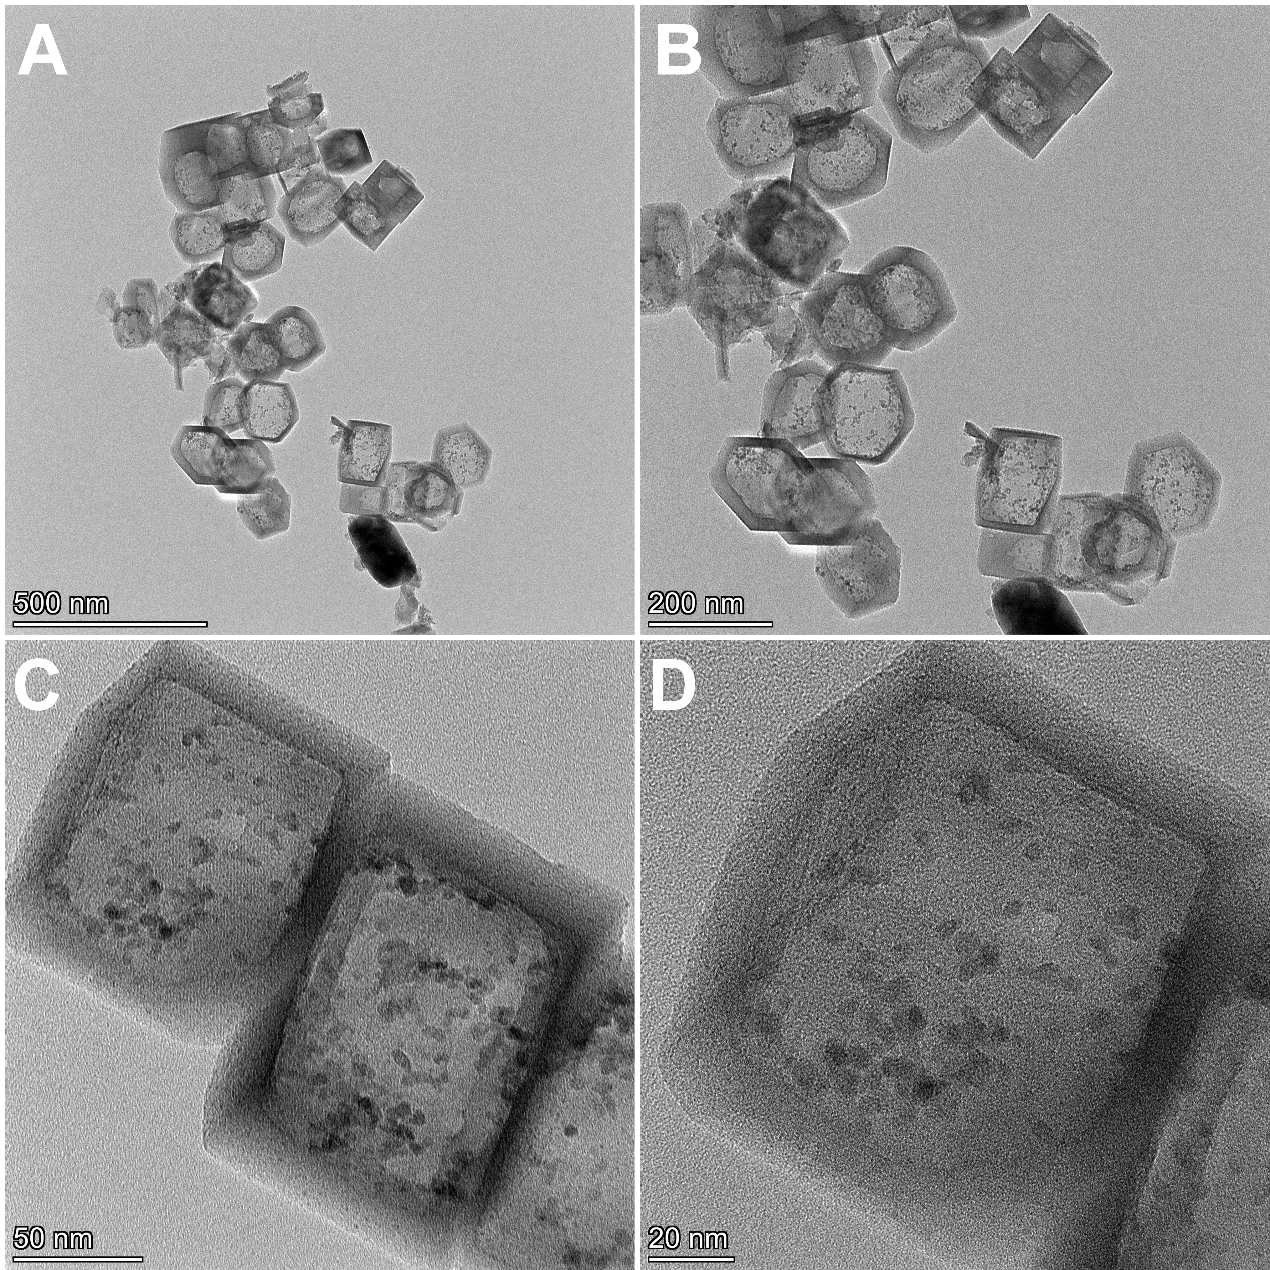


**Figure S6**. TEM images of the yolk-shell structured MnFeOx@YS-ZSM-5 nanoreactor.


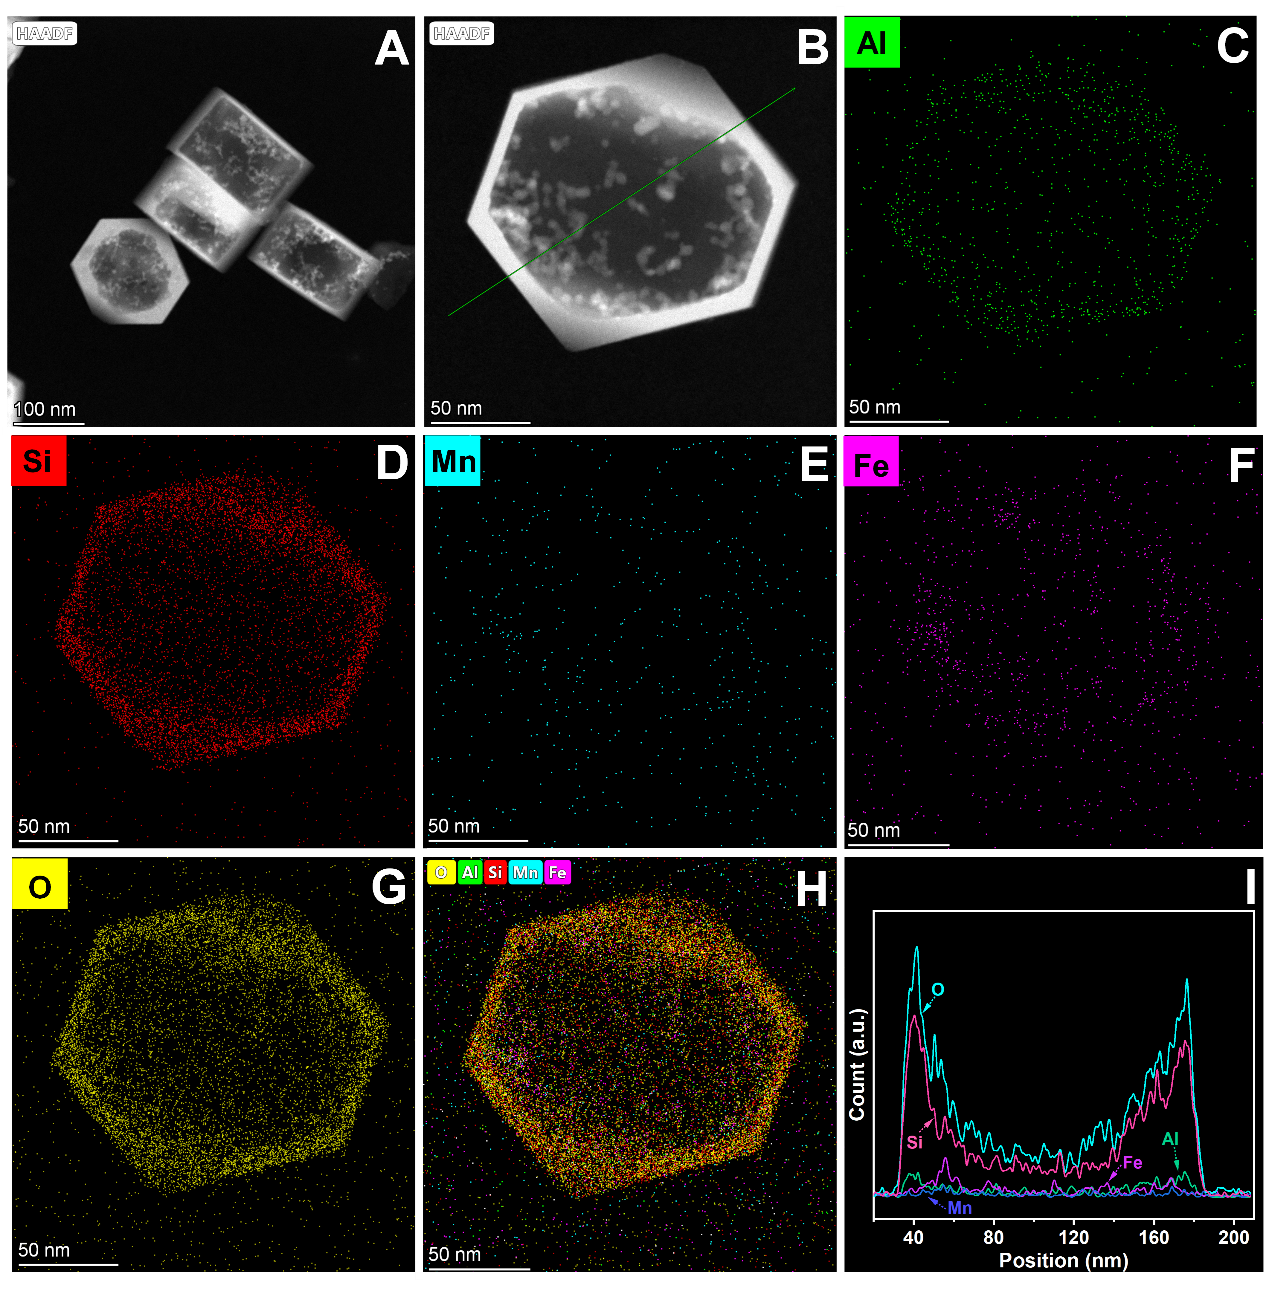


**Figure S7**. (A, B) HAADF-STEM, (C–H) EDS elemental mappings, and (I) line scan of the yolk-shell structured MnFeOx@YS-ZSM-5 nanoreactor.


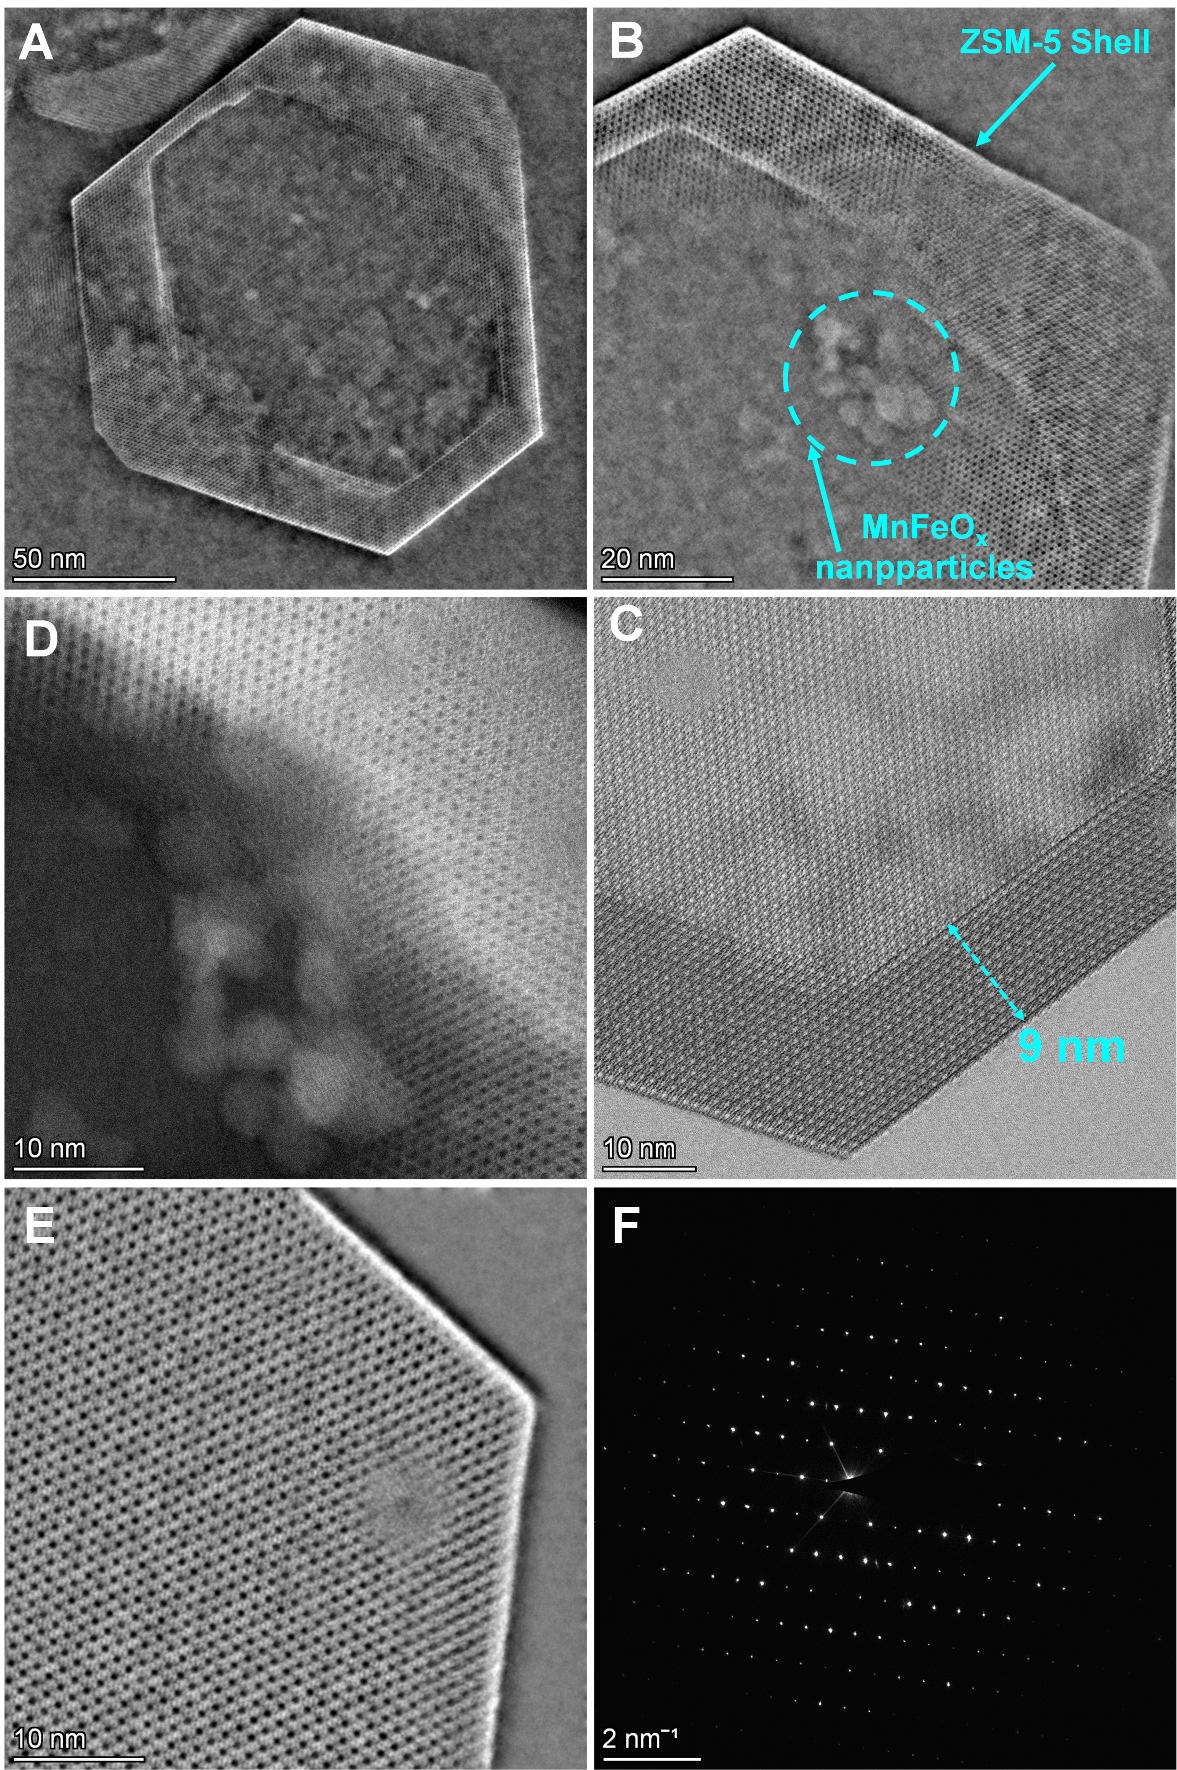


**Figure S8**. (A–E) iDPC images and (F) selected area electron diffraction (SAED) of the yolk-shell structured MnFeOx@YS-ZSM-5 nanoreactor.


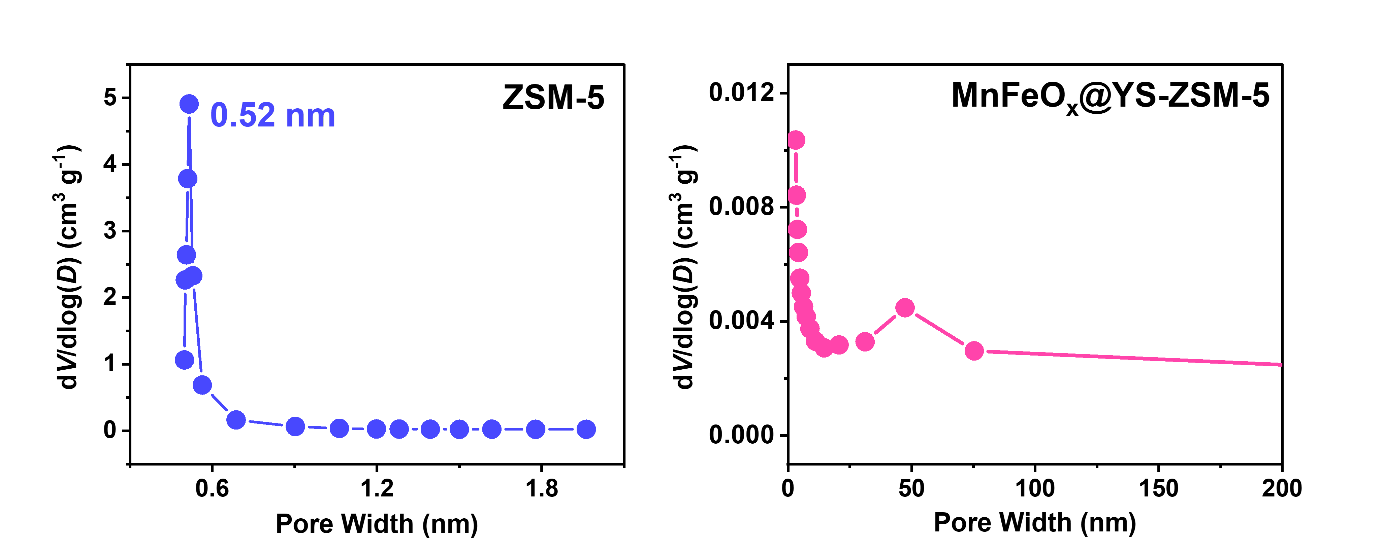


**Figure S9**. Pore-size distributions of ZSM-5 zeolite and yolk-shell structured MnFeOx@YS-ZSM-5 samples derived from the isotherms.

**Note:** The pore-size distribution curves confirm the development of a large cavity inside the zeolite framework of MnFeOx@YS-ZSM-5 nanoreactor.

**Figure S10.** Powder XRD patterns of as-prepared ZSM-5, S-1, MnFeOx, MnFeOx/ZSM-5, MnFeOx/S-1, and MnFeOx@YS-ZSM-5 samples.

**Note:** XRD patterns show that both MnFeOx/ZSM-5 and MnFeOx@YS-ZSM-5 exhibit characteristic reflections, consistent with the MFI topology of ZSM-5 zeolite (JCPDS 44-0003). These above results confirm that the zeolite framework remains intact after MnFeOx encapsulation.


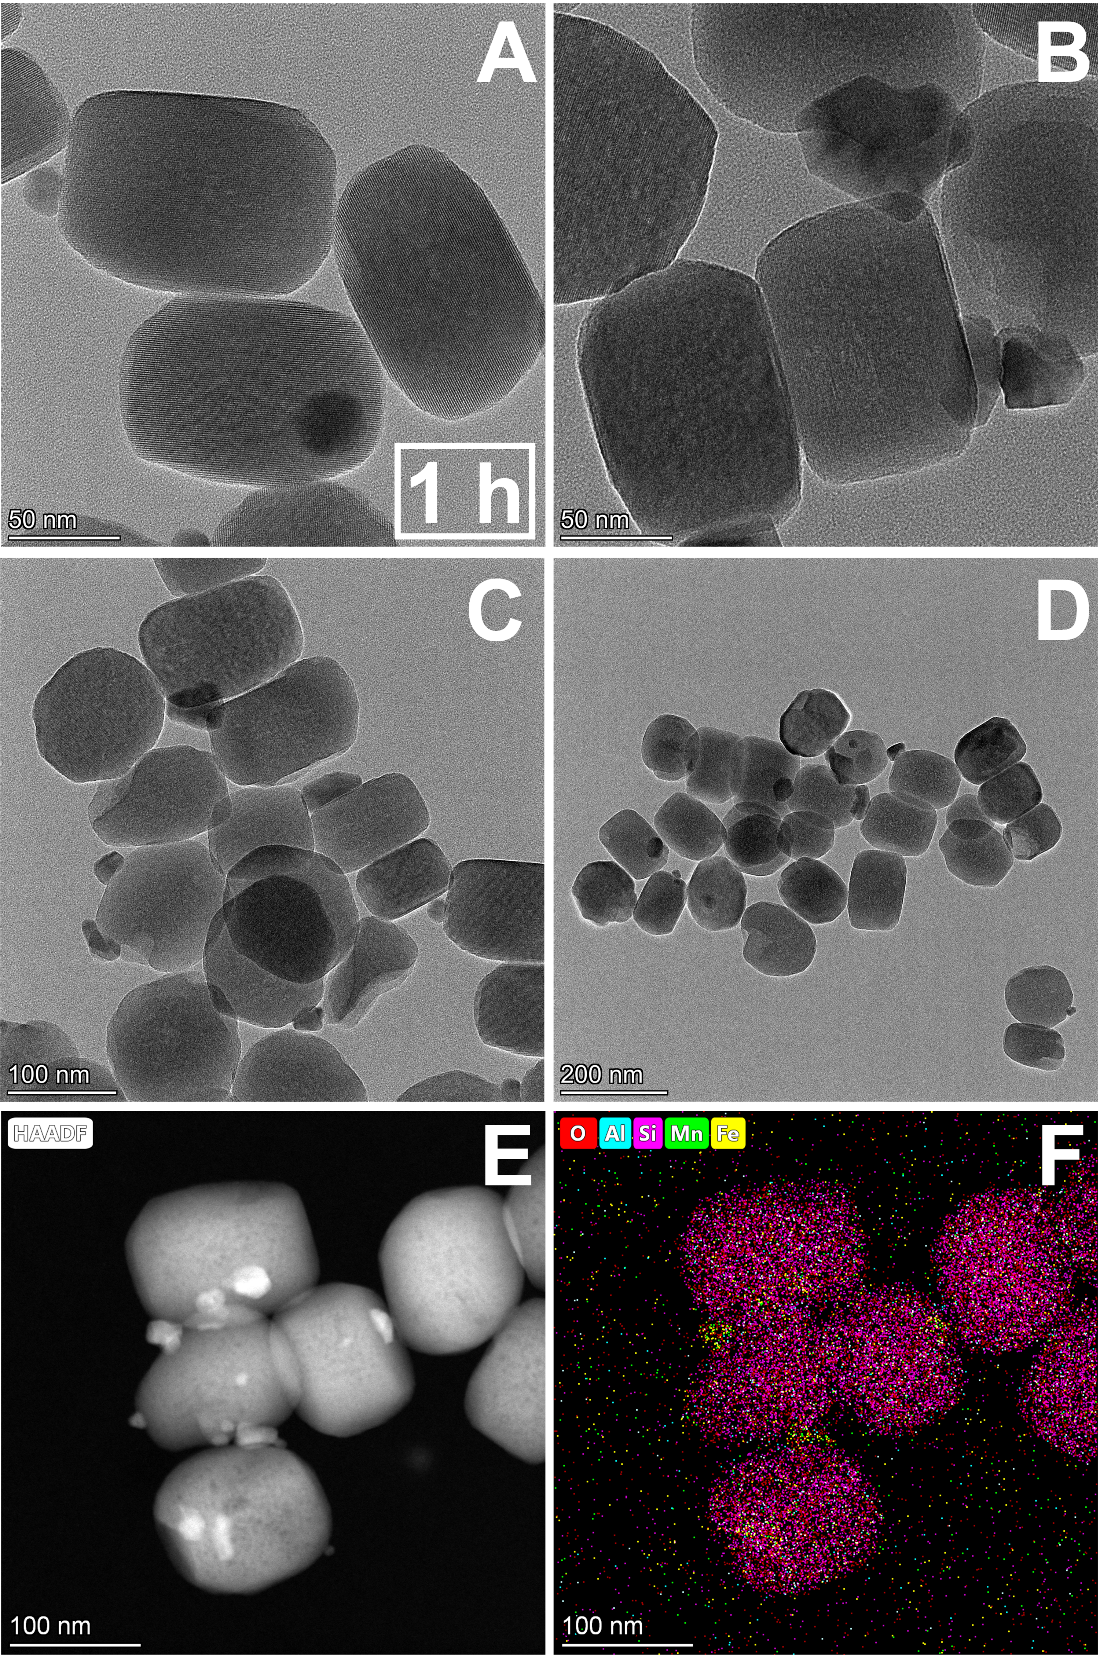


**Figure S11.** (A, B) TEM, (C) HAADF-STEM, and (D) EDS elemental mappings of MnFeOx@YS-ZSM-5 sample obtained after being hydrothermally treated in TPAOH solution at 170 °C for 1 h.

**Note:** After 1 h of hydrothermal treatment, no visible changes are observed.


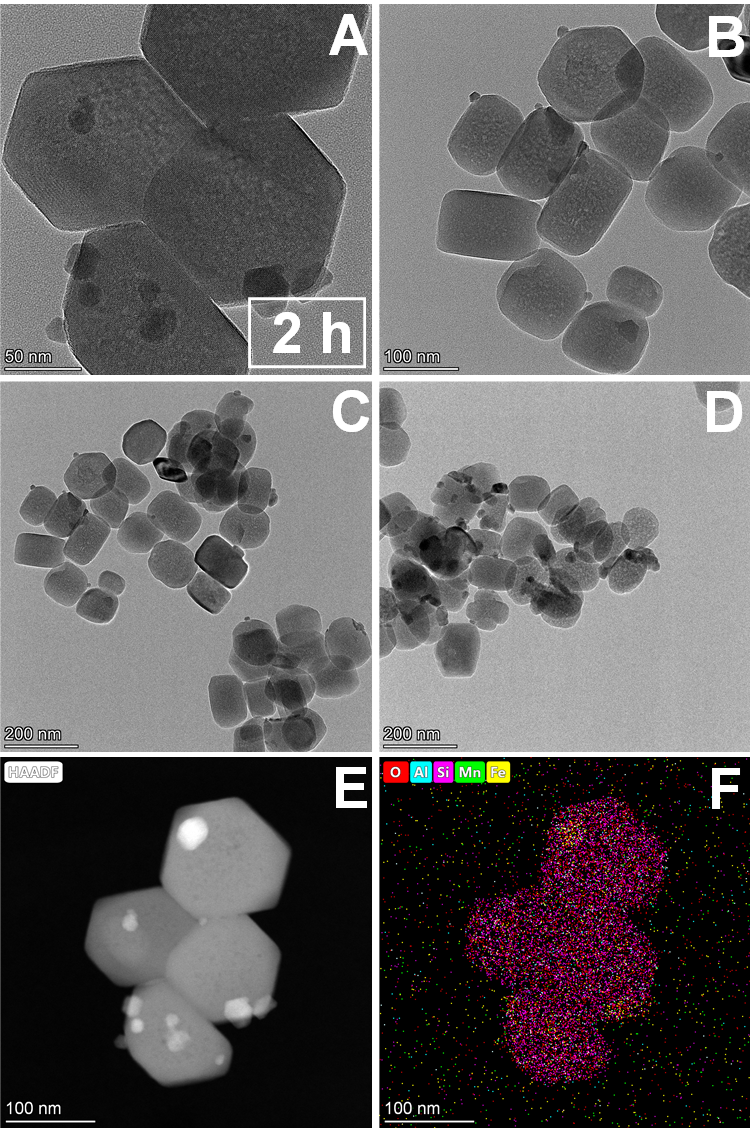


**Figure S12.** (A, B) TEM, (C) HAADF-STEM, and (D) EDS elemental mappings of the MnFeOx@YS-ZSM-5 sample obtained after being hydrothermally treated in TPAOH solution at 170 °C for 2 h.

**Note:** After 2 h, small internal voids appeared at the center of the zeolite, indicating that dissolution initially occurs in the particle interior.


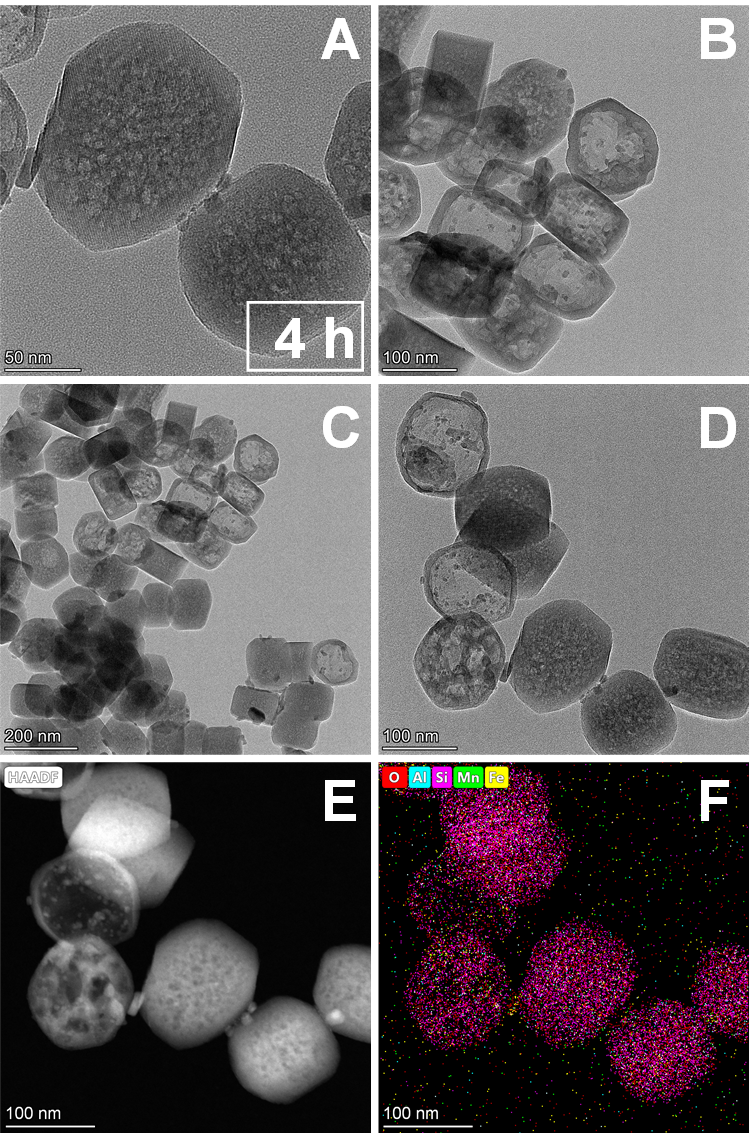


**Figure S13.** (A, B) TEM, (C) HAADF-STEM, and (D) EDS elemental mappings of the MnFeOx@YS-ZSM-5 sample obtained after being hydrothermally treated in TPAOH solution at 170 °C for 4 h.

**Note:** At 4 h, voids expanded into vesicle-like cavities, while others remained small.


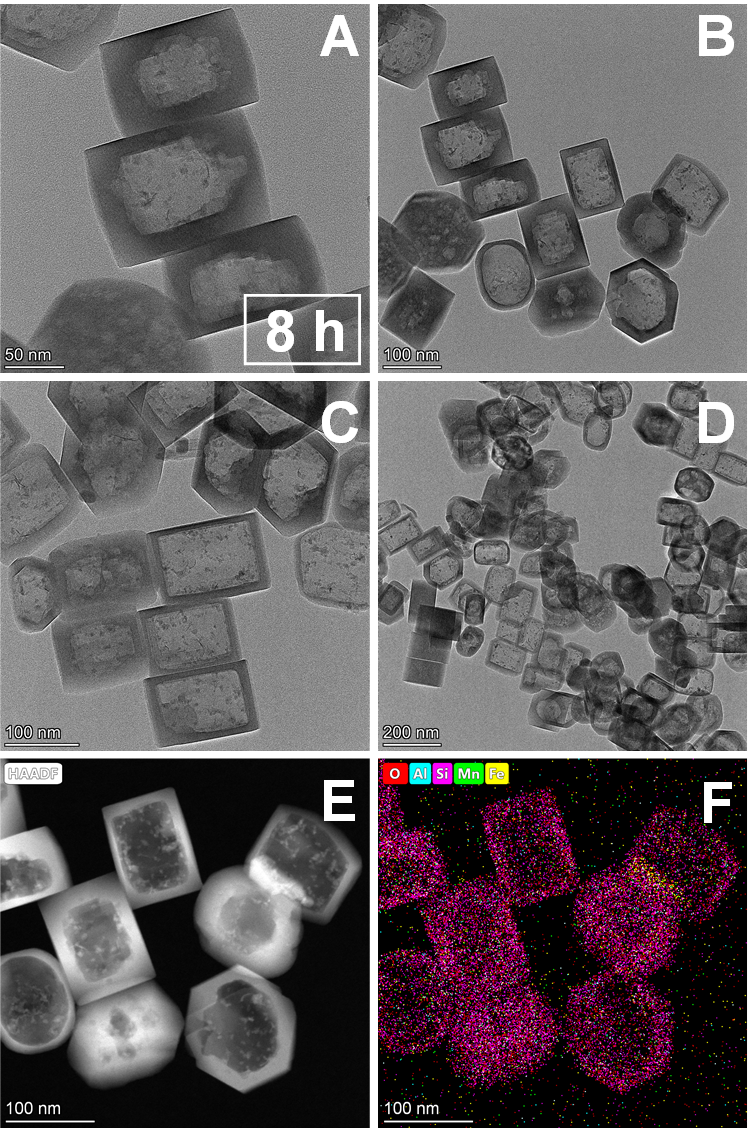


**Figure S14.** (A, B) TEM, (C) HAADF-STEM, and (D) EDS elemental mappings of the MnFeOx@YS-ZSM-5 sample obtained after being hydrothermally treated in TPAOH solution at 170 °C for 8 h.

**Note:** After 8 h, a higher proportion of particles developed to form yolk-shell structures, though some retained solid interiors.


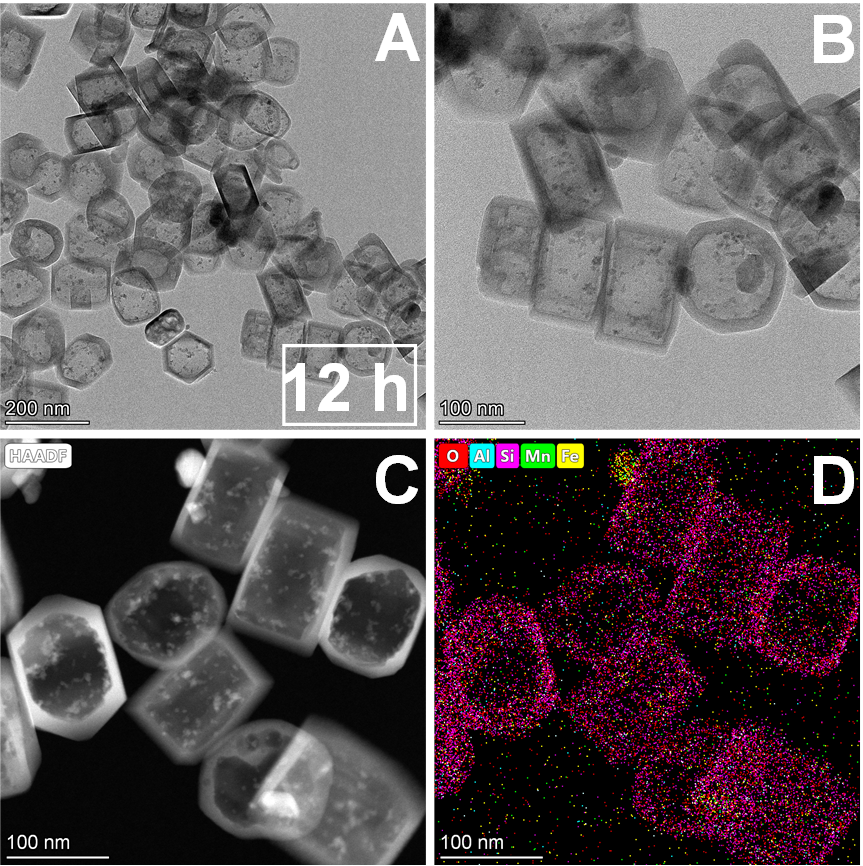


**Figure S15.** (A, B) TEM, (C) HAADF-STEM, and (D) EDS elemental mappings of the MnFeOx@YS-ZSM-5 sample obtained after being hydrothermally treated in TPAOH solution at 170 °C for 12 h.

**Note:** With prolonged hydrothermal treatment for 12 h, an increasingly larger fraction of particles exhibited well-defined hollow interiors.


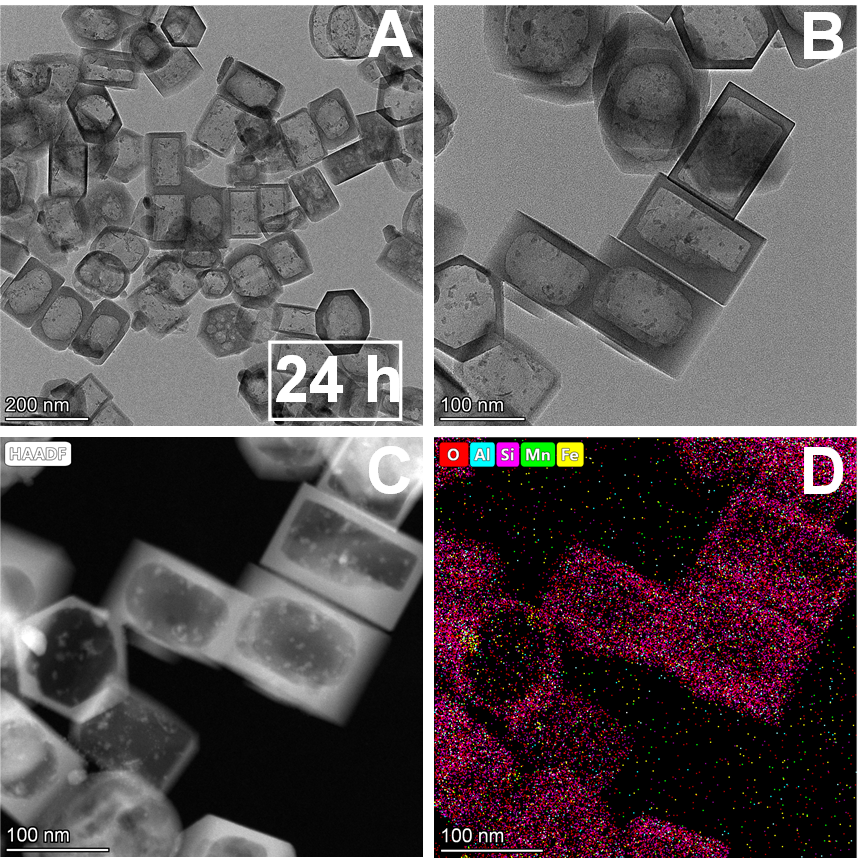


**Figure S16.** (A, B) TEM, (C) HAADF-STEM, and (D) EDS elemental mappings of the MnFeOx@YS-ZSM-5 sample obtained after being hydrothermally treated in TPAOH solution at 170 °C for 24 h.

**Note:** With prolonged hydrothermal treatment for 24 h, an increasingly larger fraction of particles exhibited well-defined hollow interiors.


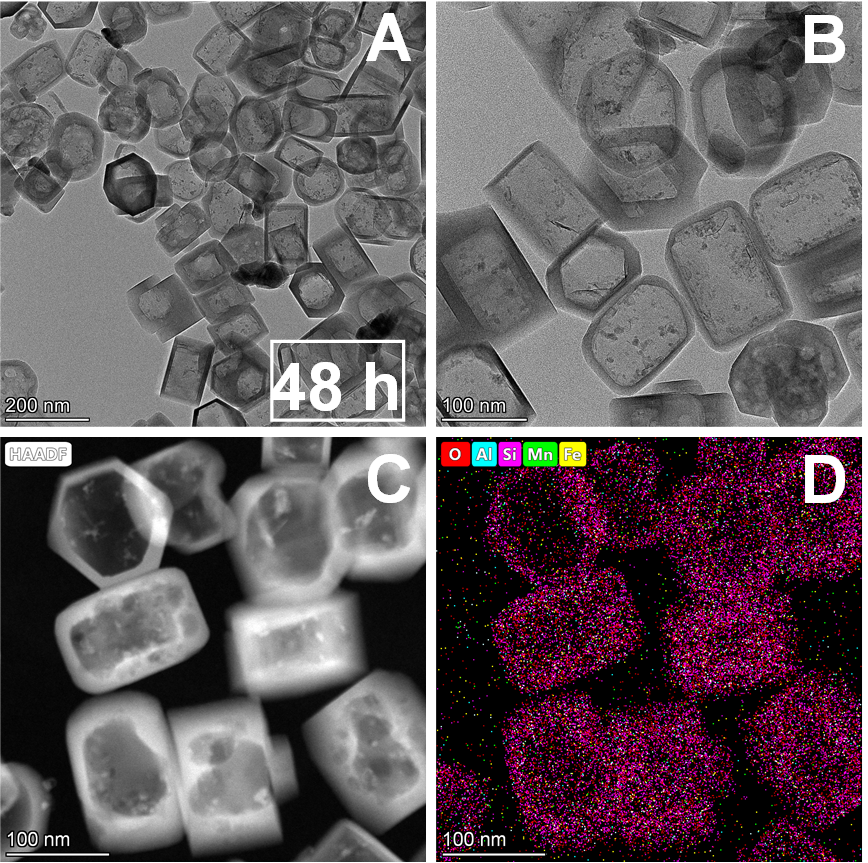


**Figure S17.** (A, B) TEM, (C) HAADF-STEM, and (D) EDS elemental mappings of the MnFeOx@YS-ZSM-5 sample obtained after being hydrothermally treated in TPAOH solution at 170 °C for 48 h.

**Note:** With prolonged hydrothermal treatment for 48 h, an increasingly larger fraction of particles exhibited well-defined hollow interiors.

**Figure S18.** N2 adsorption-desorption isotherms of MnFeOx@YS-ZSM-5 obtained after being hydrothermally treated in TPAOH solution at 170 °C with varying durations.

**Figure S19.** Powder XRD patterns of MnFeOx@YS-ZSM-5 obtained after being hydrothermally treated in TPAOH solution at 170 °C with varying durations.

**Figure S20.** Si 2p and Al 2p XPS spectra of the supported MnFeOx/ZSM-5 and yolk-shell structured MnFeOx@YS-ZSM-5 samples.


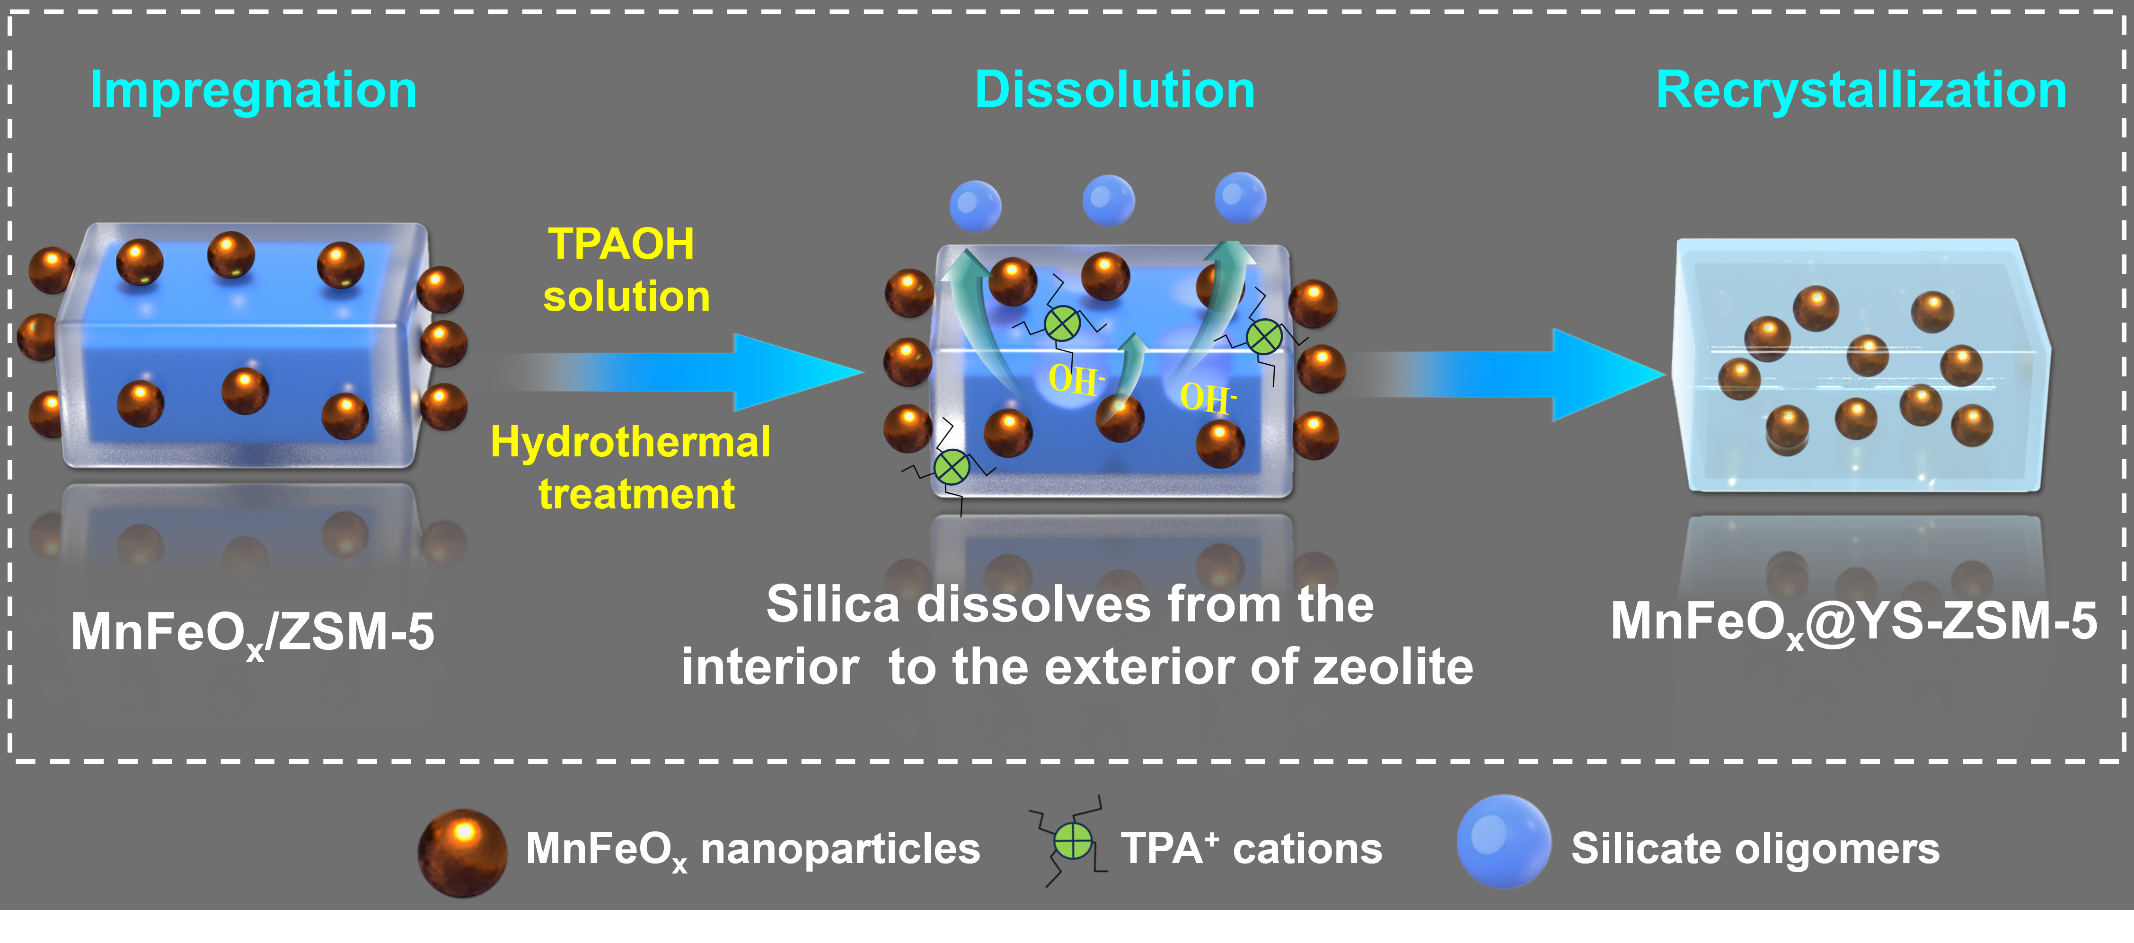


**Figure S21.** Formation mechanism of yolk-shell structured MnFeOx@YS-ZSM-5 nanoreactor.

**Note:** Pristine ZSM-5 single crystals typically exhibit a compositional gradient: Si is enriched in the interior, while Al is concentrated at the external surface. In MnFeOx/ZSM-5, Al exerts a shielding effect on neighboring Si atoms, making adjacent Si–O moieties less susceptible to alkaline etching. In addition, the internal region of the zeolite exhibits relatively lower crystallinity compared to the external surface, predisposing the particle interior to preferential dissolution. During alkaline treatment, hydroxide (OH⁻) anions penetrate the micropores and diffuse into the interior of MnFeOx/ZSM-5, promoting dissolution of silicon species. This dissolution progresses from the inside toward the outside. In contrast, the sterically bulky tetrapropylammonium (TPA⁺) cations cannot pass through the microporous channels and instead adsorb on the external surface of the zeolite via electrostatic interactions. The dissolved silicate oligomers subsequently interact with surface-adsorbed TPA⁺ and recrystallize outwardly. Through this coupled dissolution-recrystallization process, the zeolite interior undergoes selective etching, and the encapsulated MnFeOx nanoparticles become surrounded by newly crystallized zeolite layers. The metal oxide nanoparticles are in situ wrapped in the hollow zeolite cavity, similar to the cell phagocytosis processes, resulting in Si enrichment and Al depletion on the external surface compared to the parent ZSM-5 zeolite.


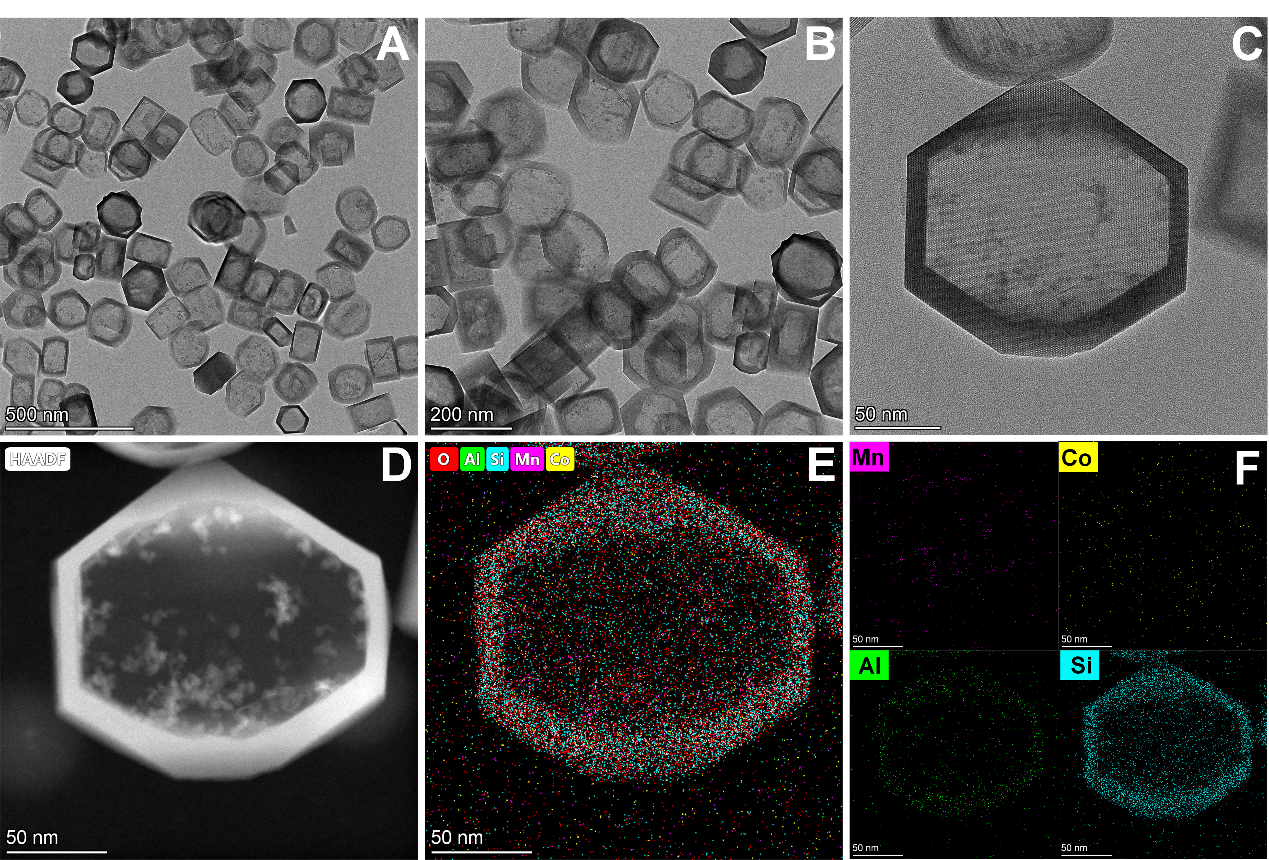


**Figure S22.** (A–C) TEM images, (D) HAADF-STEM, and (E, F) EDS elemental mappings of the yolk-shell structured MnCoOx@YS-ZSM-5 nanoreactor.


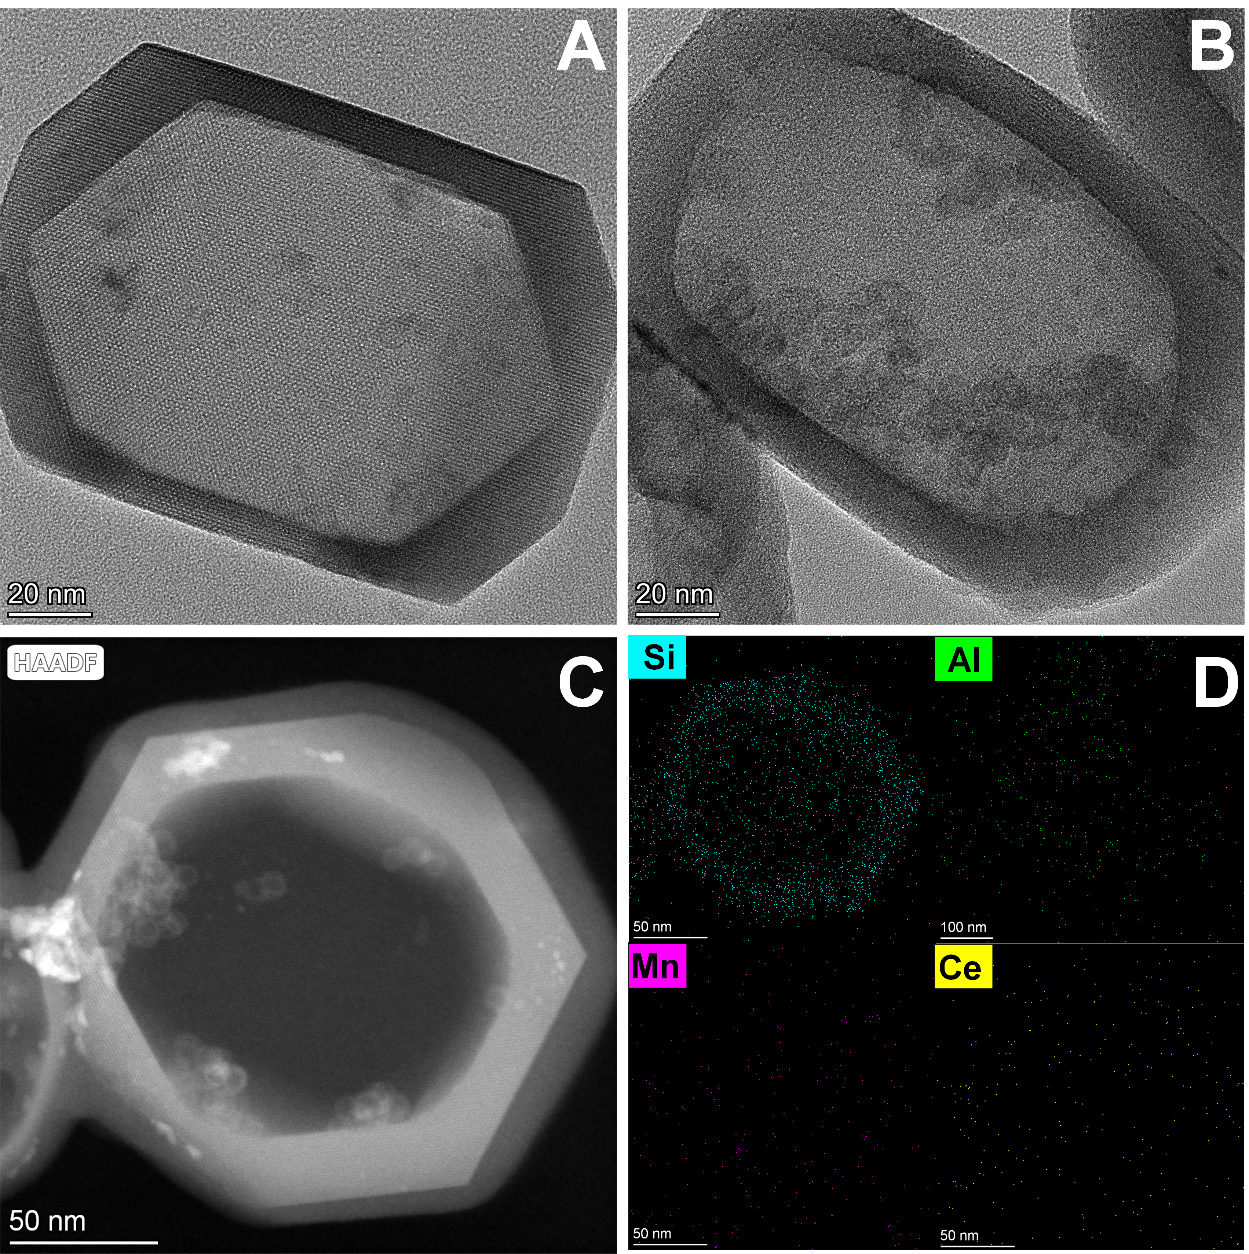


**Figure S23.** (A, B) TEM images, (C) HAADF-STEM, and (D) EDS elemental mappings of the yolk-shell structured MnCeOx@YS-ZSM-5 nanoreactor.

**Figure S24.** N2 adsorption-desorption isotherms of supported MnCoOx/ZSM-5 and yolk-shell structured MnCoOx@YS-ZSM-5 nanoreactor.

**Figure S25.** N2 adsorption-desorption isotherms of supported MnCeOx/ZSM-5 and yolk-shell structured MnCeOx@YS-ZSM-5 nanoreactor.

**Figure S26.** Powder XRD patterns of yolk-shell structured MnCoOx@YS-ZSM-5 and MnCeOx@ZSM-5 nanoreactors.

**
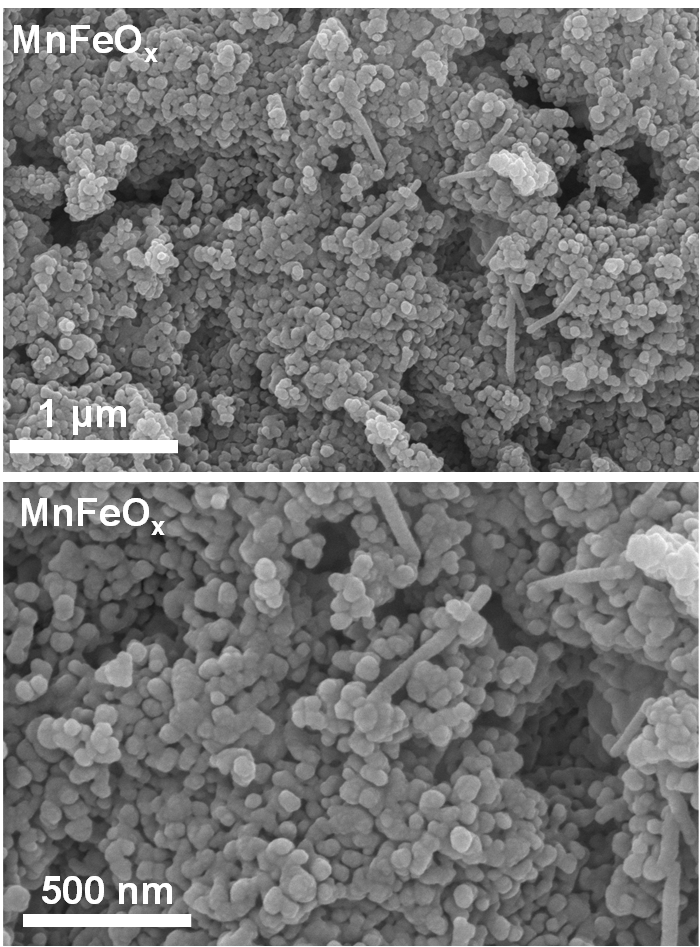
**

**Figure S27.** SEM images of the pure MnFeOx metal oxides sample.

**Note:** Pure MnFeOx sample prepared via the co-precipitation method is composed of stacked nanoparticles.

**
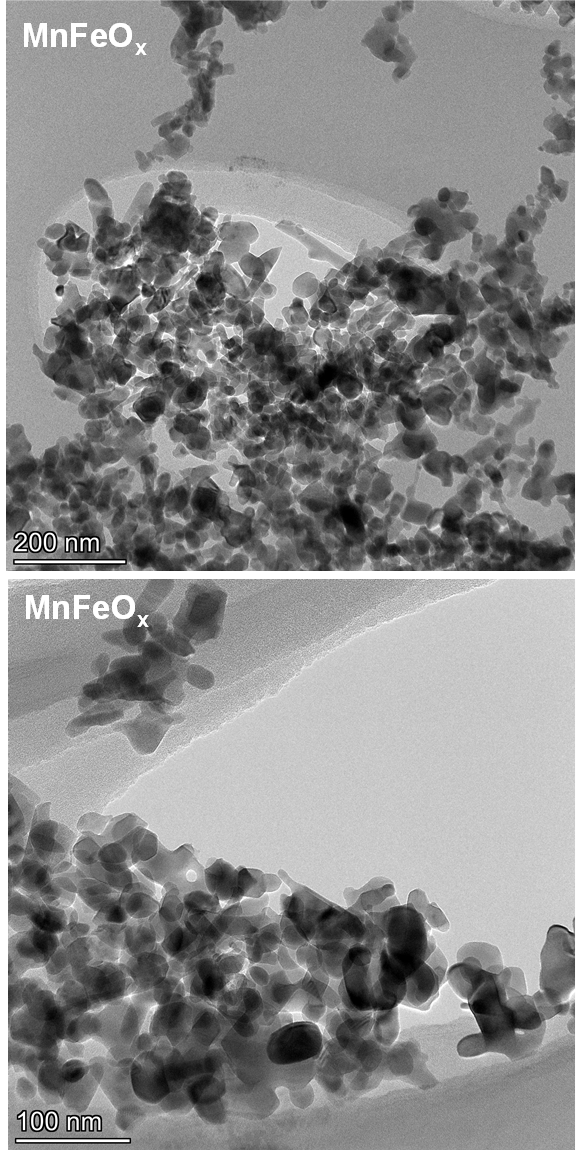
**

**Figure S28.** TEM images of the MnFeOx metal oxides sample.


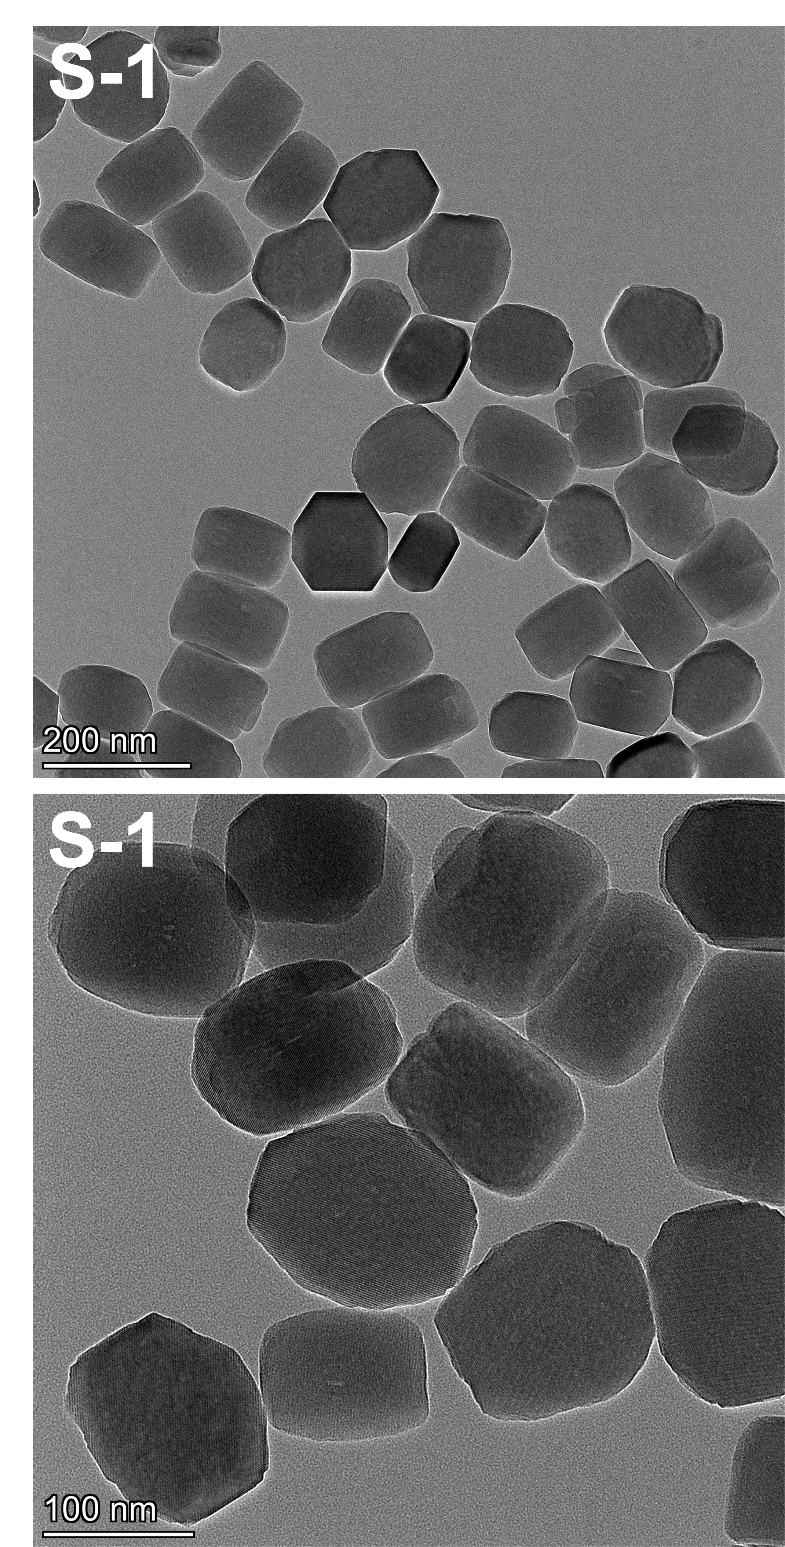


**Figure S29.** TEM images of the S-1 zeolite.

**Note:** S-1 zeolite exhibits a morphology similar to ZSM-5, with a clean surface and a primarily rod-shaped structure.

**
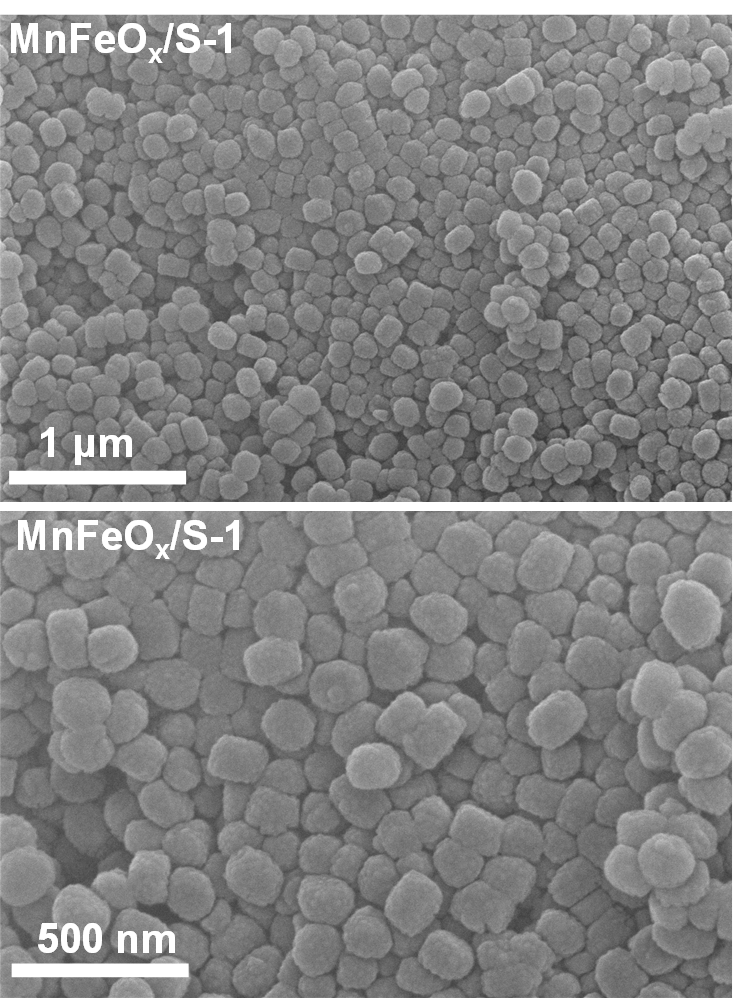
**

**Figure S30.** TEM images of the supported MnFeOx/S-1 sample.

**
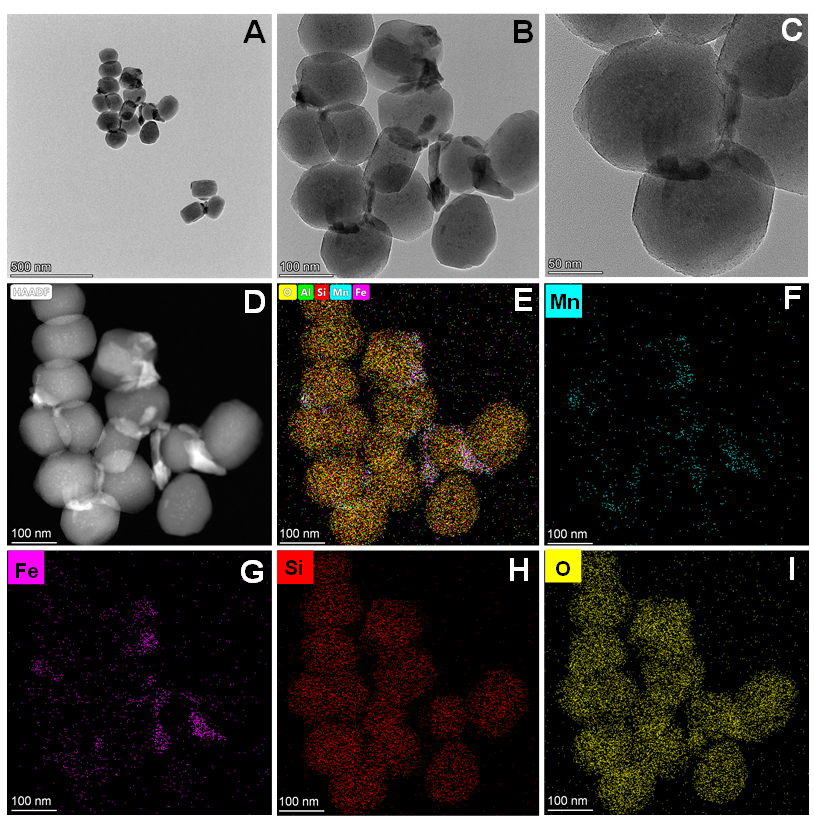
**

**Figure S31.** (A–C) TEM images, (D) HAADF-STEM, and (E–I) EDS elemental mappings of the supported MnFeOx/S-1 sample.

**Note:** In the MnFeOx/S-1 catalyst, MnFeOx metal oxides aggregates are observed stacked on the surface of the S-1 support.

**Figure S32.** N2 adsorption-desorption isotherms of the pure MnFeOx, S-1 zeolite, and supported MnFeOx/S-1 samples.

**Figure S33.** N2O concentration as a function of temperature in NH3-SCR reaction over the MnFeOx, MnFeOx/ZSM-5, MnFeOx/S-1 and yolk-shell structured MnFeOx@YS-ZSM-5 catalysts. Reaction conditions: 500 ppm NO, 500 ppm NH3, 5 vol.% O2, 5 vol.% H2O, balance N2, WHSV = 60,000 mL gcat.−1 h−1.

**Figure S34.** N2 selectivity as a function of temperature in NH3-SCR reaction over the MnFeOx, MnFeOx/ZSM-5, MnFeOx/S-1 and yolk-shell structured MnFeOx@YS-ZSM-5 catalysts. Reaction conditions: 500 ppm NO, 500 ppm NH3, 5 vol.% O2, 5 vol.% H2O, balance N2, WHSV = 60,000 mL gcat.−1 h−1.


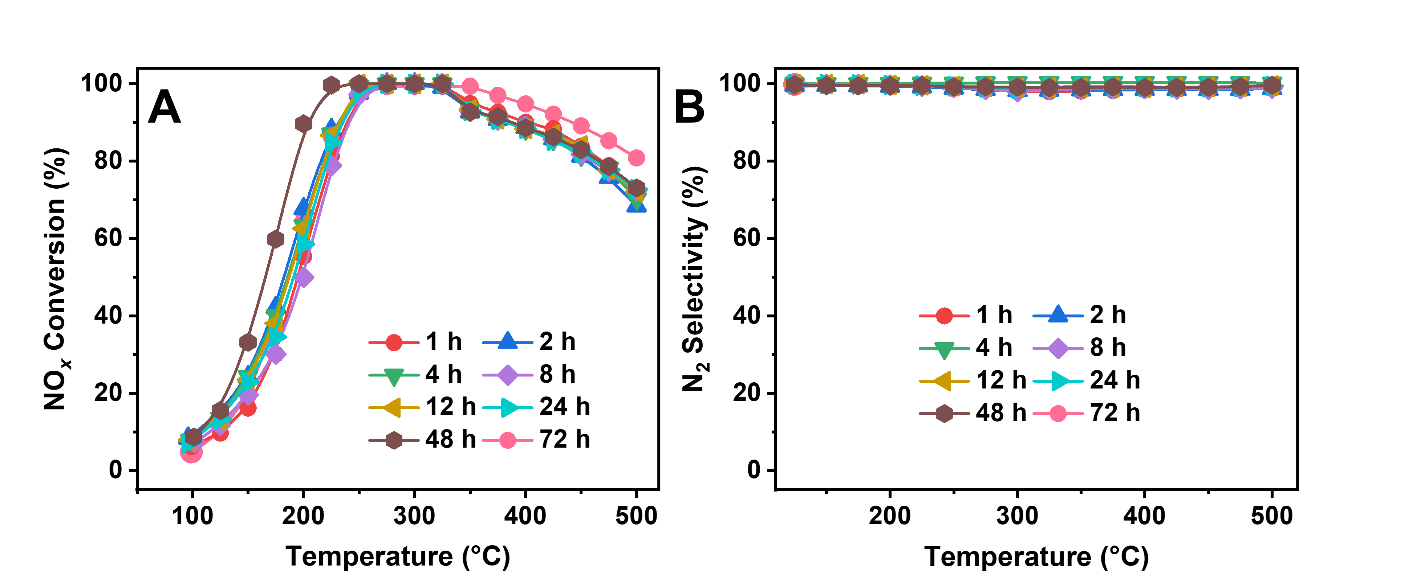


**Figure S35.** NOx conversion as a function of temperature in NH3-SCR reaction over the MnFeOx@YS-ZSM-5 obtained after being hydrothermally treated in TPAOH solution at 170 °C with varying durations. Reaction conditions: 500 ppm NO, 500 ppm NH3, 5 vol.% O2, 5 vol.% H2O, balance N2, WHSV = 60,000 mL gcat.−1 h−1.

**Figure S36.** The active temperature windows (NOx conversion higher than 80%) of the MnFeOx-based NH3-SCR catalysts reported in the literature.

**Figure S37.** Arrhenius plots of NOx conversions in SCR over the over the MnFeOx, MnFeOx/ZSM-5, MnFeOx/S-1 and MnFeOx@YS-ZSM-5 catalysts. Reaction conditions: 500 ppm NO, 500 ppm NH3, 5 vol.% O2, 5 vol.% H2O, balance N2, WHSV = 840,000 mL gcat.−1 h−1.

**Figure S38.** NOx conversion as a function of temperature in NH3-SCR reaction over the SO2-MnFeOx@YS-ZSM-5 and SO2-MnFeOx/ZSM-5 samples. The conditions for pre-sulfidation treatment: 100 mg of sample, 200 °C, 3 h; 50 ppm SO2, 500 ppm NO, 500 ppm NH3, 5 vol.% O2, 5 vol.% H2O, balance N2, WHSV = 60,000 mL gcat.−1 h−1. Reaction conditions: 500 ppm NO, 500 ppm NH3, 5 vol.% O2, 5 vol.% H2O, balance N2, WHSV = 60,000 mL gcat.−1 h−1.

**Note:** The activity of MnFeOx/ZSM-5 decreased significantly after SO2 pre-sulfation treatment. Before SO2 pre-sulfation treatment, its low-temperature activity was even slightly superior to that of the yolk-shell structured MnFeOx@YS-ZSM-5 nanoreactor; however, after pre-sulfation treatment, its low-temperature activity became lower than that of SO2-MnFeOx@YS-ZSM-5.


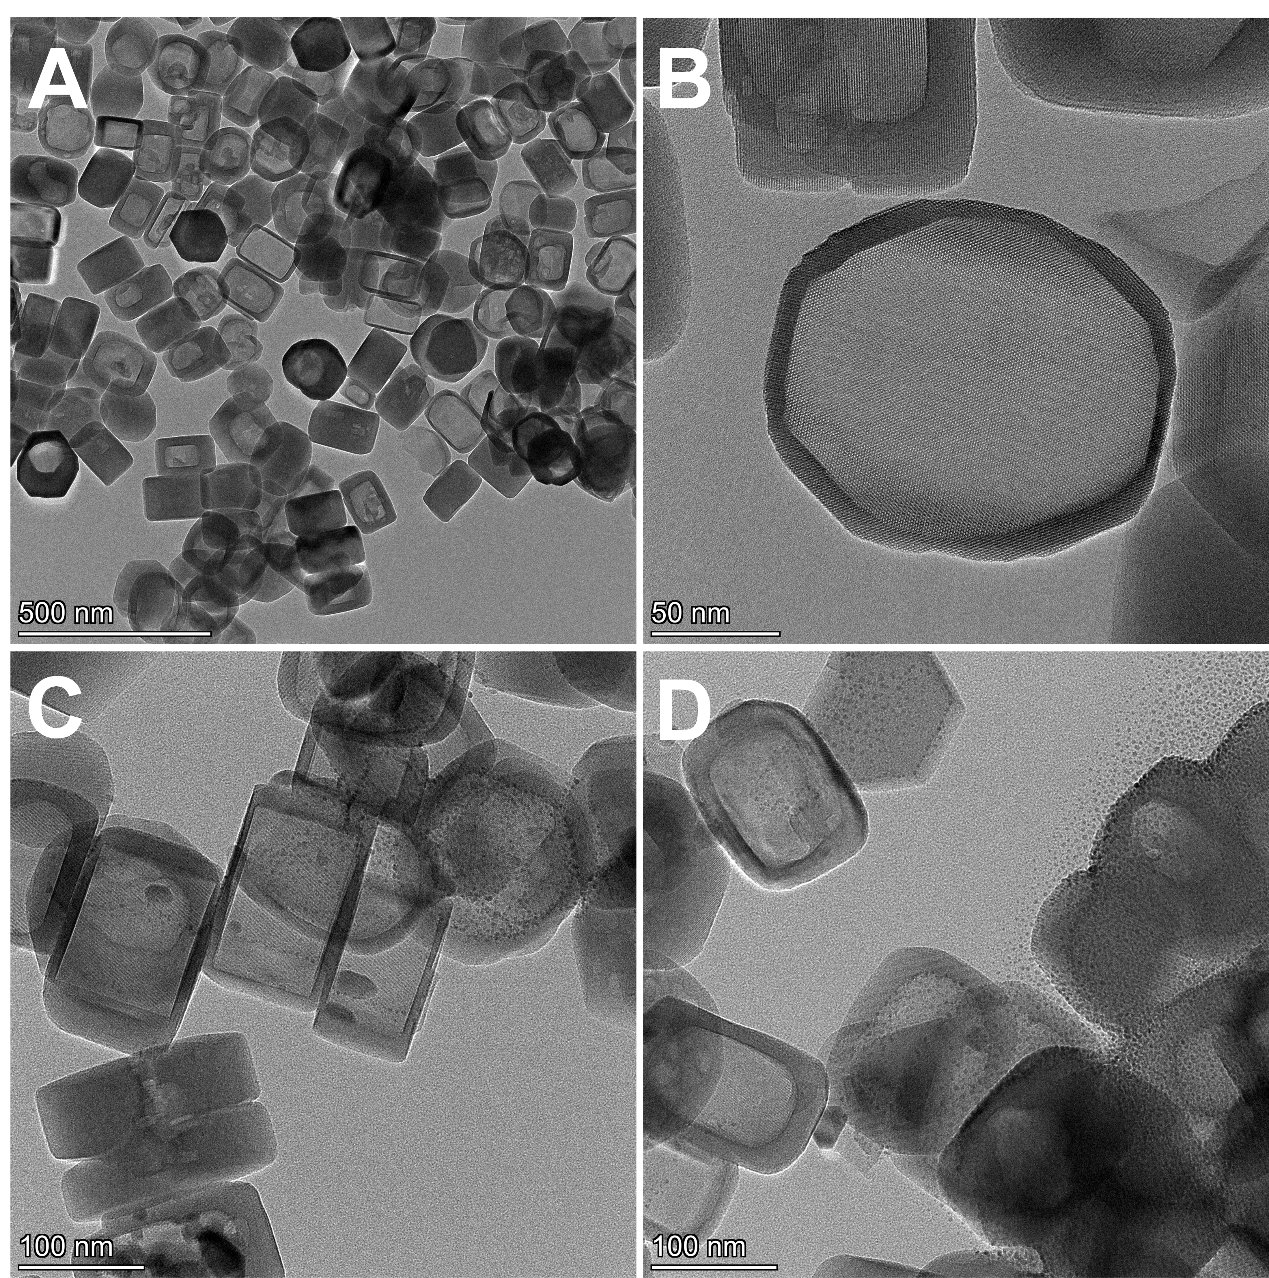


**Figure S39.** TEM images of the (A, B) hollow ZSM-5 zeolite and (C, D) supported MnFeOx/Hollow-ZSM-5 sample.

**Note:** Hydrothermal treatment of ZSM-5 zeolite with TPAOH successfully yields Hollow-ZSM-5 zeolite with a hollow structure. In the MnFeOx/Hollow-ZSM-5 supported catalyst, MnFeOx metal oxide nanoparticles are dispersed on the surface of the Hollow-ZSM-5 zeolite.

**Figure S40.** N2 adsorption-desorption isotherms of the hollow ZSM-5 zeolite and supported MnFeOx/Hollow-ZSM-5 samples.


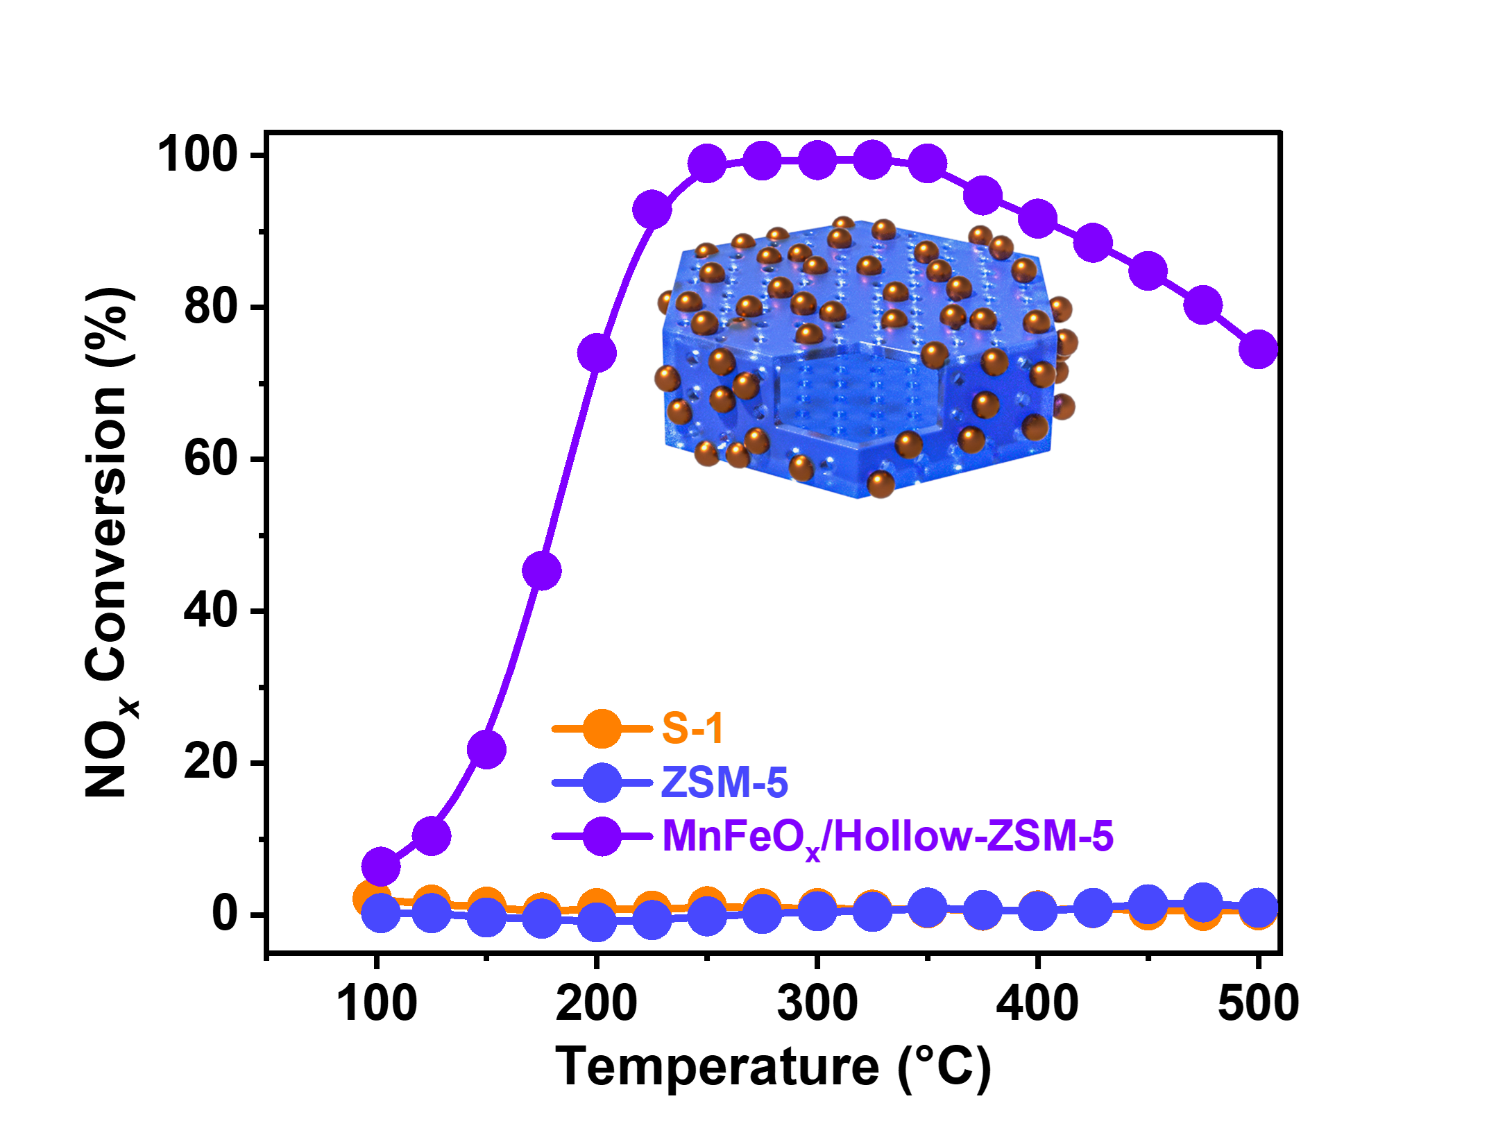


**Figure S41.** NOx conversion as a function of temperature in NH3-SCR reaction over the S-1 zeolite, ZSM-5 zeolite, and supported MnFeOx/Hollow-ZSM-5 samples. Reaction conditions: 500 ppm NO, 500 ppm NH3, 5 vol.% O2, 5 vol.% H2O, balance N2, WHSV = 60,000 mL gcat.−1 h−1.

**Note:** MnFeOx/Hollow-ZSM-5 exhibits NH3-SCR activity comparable to that of the yolk-shell structured MnFeOx@YS-ZSM-5 nanoreactor.

**Figure S42.** SO2 resistance performance over the supported MnFeOx/Hollow-ZSM-5 and yolk-shell structured MnFeOx@YS-ZSM-5 catalysts at 246 °C. Reaction conditions: 500 ppm NO, 500 ppm NH3, 5 vol.% O2, 5 vol.% H2O, 50 ppm SO2 (when used), balance N2, WHSV = 60,000 mL gcat.−1 h−1.

**Note:** The SO2 poisoning resistance over the supported MnFeOx/Hollow-ZSM-5 catalyst is significantly lower than that of the yolk-shell structured MnFeOx@YS-ZSM-5 catalyst. Upon introduction of 50 ppm SO2 at 246 °C for 2 h, the NOx conversion over MnFeOx/Hollow-ZSM-5 decreased from an initial 98% to 43%, and remained consistently around 48% over the subsequent 5.5 h. After terminating SO2 supply, the NOx conversion efficiency only slightly increased to approximately 50%.

**Figure S43.** NOx conversion as a function of temperature in NH3-SCR reaction over the K-MnFeOx/ZSM-5 and MnFeOx/ZSM-5 catalysts. Reaction conditions: 500 ppm NO, 500 ppm NH3, 5 vol.% O2, 5 vol.% H2O, balance N2, WHSV = 60,000 mL gcat.−1 h−1.

**Figure S44.** NOx conversion as a function of temperature in NH3-SCR reaction over the K-MnFeOx/S-1 and MnFeOx/S-1 catalysts. Reaction conditions: 500 ppm NO, 500 ppm NH3, 5 vol.% O2, 5 vol.% H2O, balance N2, WHSV = 60,000 mL gcat.−1 h−1.

**Note:** The low-temperature activity of the alkali metal-poisoned K-MnFeOx/S-1 catalyst decreases significantly; its activity in the medium-to-high temperature range drops even more sharply, and the active temperature window narrows drastically. This is primarily attributed to the weaker surface acidity of S-1 zeolite compared to ZSM-5 zeolite, which results in its inferior ability to resist K poisoning.

**Figure S45.** NOx conversion as a function of temperature in NH3-SCR reaction over the K-MnFeOx/ZSM-5 and K-MnFeOx@YS-ZSM-5 catalysts under the 50 ppm SO2 atmosphere. Reaction conditions: 50 ppm SO2, 500 ppm NO, 500 ppm NH3, 5 vol.% O2, 5 vol.% H2O, balance N2, WHSV = 60,000 mL gcat.−1 h−1.

**Note:** It presents the performance results for SO2/alkali metal co-poisoning resistance of the MnFeOx/ZSM-5 and MnFeOx@YS-ZSM-5 catalysts, specifically, the catalysts were first subjected to K poisoning, followed by NH3-SCR performance testing with 50 ppm SO2 in the reaction gas. From the figure, the yolk-shell structured MnFeOx@YS-ZSM-5 nanoreactor exhibits excellent resistance to SO2/alkali metal co-poisoning and shows higher low-temperature activity than the supported MnFeOx/ZSM-5 catalyst.

**Figure S46.** NH3-TPD curves over the fresh S-1 zeolite, ZSM-5 zeolite, pure MnFeOx, MnFeOx/ZSM-5, MnFeOx/S-1, and yolk-shell structured MnFeOx@YS-ZSM-5 samples.

**Note:** It is generally accepted that NH3 desorption peaks below 200 °C are attributed to NH₃ desorption from weak acid sites, those in the range of 200–350 °C correspond to NH3 desorption from medium-strong acid sites, and those peaks above 350 °C are ascribed to NH3 desorption from strong acid sites[10]. The pure MnFeOx catalyst exhibits the weakest surface acidity and the lowest acid amount, which are far lower than those of the other three oxides-zeolite coupled catalysts (MnFeOx/ZSM-5, MnFeOx/S-1, and MnFeOx@YS-ZSM-5). In contrast, the yolk-shell structured MnFeOx@YS-ZSM-5 catalyst not only exhibits the highest total acid amount but also has the largest fraction of medium-strong acid sites.

**Figure S47**. Py-IR spectra over the fresh ZSM-5 zeolite, supported MnFeOx/ZSM-5, yolk-shell structured MnFeOx@YS-ZSM-5, and related K-poisoning samples at 260 °C.

**Note:** The infrared vibration peaks at wavenumbers of 1608 cm−1 and 1455 cm−1 are attributed to the adsorption of NH3 on Lewis acid sites, the peak at 1542 cm−1 to the adsorption of NH3 on Brønsted acid sites, and the peak at 1488 cm−1 to the co-adsorption of NH3 on both Lewis and Brønsted acid sites[11]. The Pyridine IR spectrum of the fresh MnFeOx catalyst is almost a flat line, indicating extremely weak acidity. All oxides-zeolite coupled samples exhibit abundant and intense Lewis and Brønsted acid sites. The results of the Py-IR characterization corroborate those of the NH3-TPD analysis; the abundant presence of medium-strong acid sites is conducive to enhancing the medium-to-high temperature NH3-SCR activity of the catalysts.

**Figure S48.** NH3-TPD curves of the K-poisoned catalysts.

**Note:** The total acid amount of the K-MnFeOx catalyst decreases by 33% compared to the fresh MnFeOx catalyst, whereas K-MnFeOx/ZSM-5 and K-MnFeOx@YS-ZSM-5 exhibit significantly smaller reductions in total acid amount. After K poisoning, the K-MnFeOx@YS-ZSM-5 catalyst maintains the highest total acid amount—which is the key reason for its much better NH3-SCR performance after K poisoning.

**Figure S49**. H2-TPR profiles over the K-poisoned catalysts.

**Note:** Compared with the fresh catalyst, the reduction peaks of the K-MnFeOx catalyst exhibit the largest shift toward higher temperatures. In contrast, the other K-poisoned catalysts show negligible changes in their reduction peak temperatures; thus, their oxidation capacity is maintained. The alkali metal K exerts a significant poisoning effect on the pure MnFeOx metal oxide catalyst, and K poisoning impairs the oxidation performance of K-MnFeOx catalyst.

**Figure S50.** Mn 2p XPS spectra of pure MnFeOx and S-MnFeOxsamples.

**Figure S51.** SO2-TPD curves over the MnFeOx, MnFeOx/ZSM-5, and yolk-shell structured MnFeOx@YS-ZSM-5 samples.

**Note:** The yolk-shell structured MnFeOx@YS-ZSM-5 exhibits the smallest SO2 desorption peak area, indicating reduced sulfate formation on MnFeOx@YS-ZSM-5 nanoreactor.

**Figure S52.** Mn 2p XPS spectra of the K-poisoned catalysts.

**Figure S53.** *In situ* DRIFT spectra of NH3 adsorption over pure MnFeOx catalyst at 200 °C.

**Note:** At 4 min of NH3 adsorption, characteristic peaks at 1197 cm−1 and 1295 cm−1 are observed, both absorption peaks are attributed to NH3 species adsorbed on Lewis acid sites (NH3-L) over the catalyst surface[12,13]. With increasing adsorption time, the intensities of these two characteristic peaks increase slowly and eventually reach saturation. After 40 min of adsorption, followed by N2 purging for 30 min, a significant decrease in the peak intensities is observed, indicating weak acidity of the Lewis acid sites on the catalyst surface and their poor ability to adsorb NH3.

**Figure S54.***In situ* DRIFT spectra of pre-adsorbed NH3 species reacted with NO + O2 over the pure MnFeOx catalyst at 200 °C.

**Figure S55.** *In situ* DRIFT spectra of NO + O2 adsorption over the pure MnFeOx catalyst at 200 °C.

**Note:** After adsorption of NO + O2 on pure MnFeOx, infrared characteristic peaks of monodentate nitrates (1544 cm−1) and bridged nitrates (1232 cm−1) rapidly form on its surface[14,15], and the intensities of these peaks increase rapidly with prolonged adsorption time.

**Figure S56.** *In situ* DRIFT spectra of pre-adsorbed NO + O2 species reacted with NH3 over the pure MnFeOx catalyst at 200 °C.

**Note:** Upon introduction of NH3, the intensity of the vibrational peaks corresponding to monodentate nitrates on the catalyst surface gradually decreases, and the peaks disappear completely after 6 min. Subsequently, NH3-L species emerge on the catalyst surface. Thus, the reaction follows the typical Langmuir-Hinshelwood mechanism, wherein adsorbed NO species react with adsorbed NH3 species.

**Figure S57.** NO-TPD curves of the pure MnFeOx and yolk-shell structured MnFeOx@YS-ZSM-5 samples.

**Note:** Pure MnFeOx exhibits a larger NO desorption peak area, indicating that more NO is adsorbed onto the surface.

**Figure S58.** Top view and side view of optimized MnFeOx structure.

**Figure S59.** Top view and side view of optimized MnFeOx@YS-ZSM-5 structure.

**Figure S60.** Optimized adsorption configurations of SO2 gas molecules on Brønsted acid sites in ZSM-5 zeolite structure.

**Figure S61.***In situ* Mn *K*-edge XANES spectra of the transient reaction over the yolk-shell structured MnFeOx@YS-ZSM-5 catalyst after 0, 2 and 3 h treatment at 246 °C in an atmosphere of 250 ppm SO2 + 5 vol.% O2.

**Supplementary Tables**

| Samples | SBETa  (m2 g−1) | Vtotalb  (cm3 g−1) |
| --- | --- | --- |
| ZSM-5 | 461 | 0.29 |
| MnFeOx/ZSM-5 | 341 | 0.33 |
| MnFeOx@YS-ZSM-5 | 344 | 0.41 |
| MnFeOx | 25 | 0.20 |
| MnFeOx/S-1 | 285 | 0.25 |
| S-1 | 339 | 0.27 |

**Table S1.** Specific surface area and pore volume of the samples.

a Calculated by BET method.

b Determined by BJH method.

**Note:** The Brunauer-Emmett-Teller (BET) surface area remained nearly unchanged after the TPAOH hydrothermal treatment, whereas the total pore volume increased from 0.33 cm3 g−1 for MnFeOx/ZSM-5 to 0.41 cm3 g−1 for MnFeOx@YS-ZSM-5 nanoreactor. This increase can be attributed to the cavity formation during the hollowing of the ZSM-5 zeolite.

**Table S2.** Comparison with literature about the performances of MnFeOx-based catalysts for NH3-SCR.

| Catalysts | Temperature window for  >80% NOx conversion | References |
| --- | --- | --- |
| MnFeOx@YS-ZSM-5 | 280 °C | This work |
| MnFe-AC | 183 °C | [16] |
| MnFe | 166 °C | [17] |
| MnFe | 151 °C | [18] |
| MnFeOx | 206 °C | [19] |
| MnFeOx | 180 °C | [20] |
| MnOx-FeOx nanoneedles | 216 °C | [21] |
| Mn-Fe | 215 °C | [22] |
| SmMnFe-0.1 | 191 °C | [17] |
| Mn10Fe10/W5Ti | 240 °C | [23] |
| MnFeCe | 118 °C | [24] |
| MnFe-TOS | 200 °C | [25] |
| MnFeCeAl-Nb | 149 °C | [26] |
| 5Fe–3Mn–S/TiO2 | 200 °C | [27] |
| 11.2Fe11Mn/SBA-15 | 169 °C | [28] |
| Fe-Mn/CeO2 | 181 °C | [29] |
| Mn–Fe/TS-1(R-2) | 155 °C | [30] |

**Mass and Heat Transfer Calculations for NH3-SCR upon different catalyst**

**For PBR reaction mode (0.05% NO/ 0.05% NH3 / 5% O2/ 94.9% N2)**

**Mears Criterion for External Diffusion**

The absence of mass transport resistances was checked by Mears’ criterion () for external diffusion:

where , mol kgcat. −1 s−1;

= gas flow rate of NO*x*,mol s−1;

= mass weight of the sample = 0.0250 g;

= the maximum temperatures during NH3-SCR kinetic measurements, K;

= the NOx conversion at maximum temperatures;

n = reaction order = 1; = catalyst particle radius = 1.3510−4 m;

= solid catalyst density, kg m−3;

= bulk density of catalyst bed, kg m−3

= (1-*Φ*) (*Φ* = porosity);

≈ ≈ ;

= external mass transfer coefficient = 0.1 m s−1; = bulk gas concentration of NO*x* at maximum temperatures, mol m−3.

For the kinetic measurements, a total gas flow rate of 350 mL min−1 and a catalyst particle size of 0.27 mm were employed. And the highest concentration of NO*x* employed in the feed was 0.05%.

**Table S3.** The over the various catalysts in NH3-SCR performance.

| Catalysts |  |  |  |  |  |  |
| --- | --- | --- | --- | --- | --- | --- |
| MnFeOx | 2027 | 463.15 | 8.8810-4 | 17.0% | 0.0185 | 0.1313 |
| MnFeOx/ZSM-5 | 748 | 463.15 | 6.7910-4 | 13.0% | 0.0194 | 0.0353 |
| MnFeOx/S-1 | 782 | 433.15 | 3.4010-4 | 6.5% | 0.0208 | 0.0172 |
| MnFeOx@YS-ZSM-5 | 733 | 473.15 | 4.5610-4 | 8.7% | 0.0203 | 0.0221 |

, therefore, external mass transfer effects can be neglected.

**Weisz-Prater Criterion for Internal Diffusion**

The absence of mass transport resistances was checked by Weisz-Prater criterion () for internal diffusion:

where = observed reaction rate ≈ , mol kgcat. −1 s−1;

= gas flow rate of NO*x*,mol s−1; = mass weight of the sample = 0.0250 g;

= the maximum temperatures during NH3-SCR kinetic measurements, K;

= the NOx conversion at maximum temperatures;

n = reaction order = 1; = catalyst particle radius = 1.3510−4 m;

= solid catalyst density, kg m−3;

= bulk density of catalyst bed, kg m−3

= (1-*Φ*) (*Φ* = porosity);

≈ ≈ ; = effective diffusivity = 8.910−6 m2 s−1;
 = gas concentration of NOx at the catalyst surface, mol m-3, ≈

**Table S4.** The over the various catalysts in NH3-SCR performance.

| Catalysts |  |  |  |  |  |  |
| --- | --- | --- | --- | --- | --- | --- |
| MnFeOx | 2027 | 463.15 | 8.8810-4 | 17.0% | 0.0185 | 0.1991 |
| MnFeOx/ZSM-5 | 748 | 463.15 | 6.7910-4 | 13.0% | 0.0194 | 0.0536 |
| MnFeOx/S-1 | 782 | 433.15 | 3.4010-4 | 6.5% | 0.0208 | 0.0261 |
| MnFeOx@YS-ZSM-5 | 733 | 473.15 | 4.5610-4 | 8.7% | 0.0203 | 0.0336 |

, therefore, internal mass transfer effects can be neglected.

**Mears Criterion for External (Interphase) Heat Transfer**

The absence of heat transfer was checked by Mears’ criterion:

Where = heat of reaction, kJ mol-1= 1.628103 kJ mol-1
 = observed reaction rate ≈ , mol kgcat. −1 s−1;

= gas flow rate of NO*x*,mol s−1; = mass weight of the sample = 0.0250 g;

= the maximum temperatures during NH3-SCR kinetic measurements, K;

= the NO*x* conversion at maximum temperatures;

= catalyst particle radius = 1.3510−4 m

= bulk density of catalyst bed, kg m−3

= (1-*Φ*) (*Φ* = porosity)

= activation energy, kJ mol−1 (from **Figure S**),= heat transfer coefficient between gas and pellet = 5.3 kJ m−2 s-1 K−1, = gas constant = 8.314 10−3 kJ mol-1 K-1

**Table S5.** The over the various catalysts in NH3-SCR performance.

| Catalysts |  |  |  |  |  |  |
| --- | --- | --- | --- | --- | --- | --- |
| MnFeOx | 2027 | 463.15 | 8.8810-4 | 17.0% | 40.6 | 1.710-3 |
| MnFeOx/ZSM-5 | 748 | 463.15 | 6.7910-4 | 13.0% | 19.1 | 2.310-4 |
| MnFeOx/S-1 | 782 | 433.15 | 3.4010-4 | 6.5% | 19.6 | 1.410-4 |
| MnFeOx@YS-ZSM-5 | 733 | 473.15 | 4.5610-4 | 8.7% | 20.9 | 1.610-4 |

, therefore, external (interphase) heat transfer effects can be neglected.

**Table S6.** The acidic properties of the fresh MnFeOx, MnFeOx/ZSM-5, MnFeOx/S-1, MnFeOx@YS-ZSM-5, and related K-poisoned catalysts.

| Samples | Total acid amount  (mmol g−1) | Weak acid amount  (mmol g−1) | Medium and strong acid (mmol g−1) | The desorption peak temperature (°C) and the acid amount corresponding to this peak (mmol g−1) |
| --- | --- | --- | --- | --- |
| MnFeOx | 0.055 | 0.044 | 0.011 | 108 (0.010), 171 (0.034), 263 (0.011) |
| MnFeOx/ZSM-5 | 0.243 | 0.157 | 0.086 | 110 (0.048), 153 (0.109), 280 (0.086) |
| MnFeOx/S-1 | 0.113 | 0.078 | 0.035 | 106 (0.033), 145 (0.045), 270 (0.035) |
| MnFeOx@YS-ZSM-5 | 0.341 | 0.203 | 0.138 | 111 (0.031), 155 (0.172), 295 (0.138) |
| ZSM-5 | 0.237 | 0.170 | 0.067 | 115 (0.079), 158 (0.091), 352 (0.067) |
| S-1 | 0.085 | 0.071 | 0.014 | 103 (0.055), 135 (0.016), 222 (0.014) |
| K-MnFeOx | 0.037 | 0.027 | 0.010 | 104 (0.008), 161 (0.019), 263 (0.010) |
| K-MnFeOx/ZSM-5 | 0.199 | 0.136 | 0.063 | 107 (0.038), 144 (0.098), 246 (0.063) |
| K-MnFeOx/S-1 | 0.068 | 0.052 | 0.016 | 109 (0.023), 144 (0.029), 237 (0.016) |
| K-MnFeOx@YS-ZSM-5 | 0.227 | 0.183 | 0.044 | 115 (0.071), 161 (0.112), 318 (0.044) |

**Table S7.** Surface component of different species from XPS data over different samples.

| Catalysts | Atomic Concentration  (mol.%) | | | | | | | Surface species content (%) |
| --- | --- | --- | --- | --- | --- | --- | --- | --- |
| Mn | Fe | Si | Al | O | K | S | Mn4+/Mn |
| MnFeOx | 17.44 | 13.92 | - | - | 68.64 | - | - | 39.6 |
| MnFeOx/ZSM-5 | 5.80 | 8.74 | 23.79 | 1.62 | 60.05 | - | - | 32.3 |
| MnFeOx@YS-ZSM-5 | 5.70 | 7.24 | 21.71 | 1.55 | 63.8 | - | - | 29.4 |
| S-MnFeOx | 13.97 | 17.29 | - | - | 66.76 | - | 1.98 | 30.9 |
| S-MnFeOx/ZSM-5 | 7.21 | 20.23 | 20.23 | 1.11 | 60.7 | - | 1.42 | 24.5 |
| S-MnFeOx@YS-ZSM-5 | 5.45 | 8.31 | 23.87 | 1.31 | 60.59 |  | 0.47 | 28.3 |
| K-MnFeOx | 18.8 | 17.31 | - | - | 63.21 | 0.68 | - | 32.9 |
| K-MnFeOx/ZSM-5 | 6.48 | 7.33 | 22.76 | 1.48 | 61.24 | 0.71 | - | 32.4 |
| K-MnFeOx@YS-ZSM-5 | 7.22 | 6.43 | 20.12 | 1.32 | 64.3 | 0.61 | - | 29.5 |

**Supplementary References**

[1] H. Wang, M. Lin, T. Murayama, S. Feng, M. Haruta, H. Miura, T. Shishido, *ACS Catal.* **2021**, *11*, 8576-8584.

[2] S. T. Oyama, X. Zhang, J. Lu, Y. Gu, T. Fujitani, *J. Catal.* **2008**, *257*, 1-4.

[3] R. A, H. J, K. G, *Journal of Physics: Condensed Matter*. **2003**, *15*, 979.

[4] G. Kresse, J. Furthmüller, *Comput. Mater. Sci.* **1996**, *6*, 15-50.

[5] K. Burke, M. Ernzerhof, J. P. Perdew, *Phys. Rev. Lett.* **1996**, *77*, 3865-3868.

[6] S. L. Dudarev, G. A. Botton, S. Y. Savrasov, C. J. Humphreys, A. P. Sutton, *Phys. Rev. B* **1998**, *57*, 1505.

[7] O. Bengone, M. Alouani, P. Blöchl, J. Hugel, *Phys. Rev. B*. **2000**, *62*, 16392.

[8] B. Zhu, Q. Fang, Y. Sun, S. Yin, G. Li, Z. Zi, T. Ge, Z. Zhu, M. Zhang, J. Li, *J. Mater. Sci.* **2018**, *53*, 11500-11511.

[9] A. Bouzoubaa, D. Costa, B. Diawara, N. Audiffren, P. Marcus, *Corros. Sci.* **2010**, *52*, 2643-2652.

[10] Z. Jia, Y. Shen, T. Yan, H. Li, J. Deng, J. Fang, D. Zhang, *Environ. Sci. Technol.* **2022**, *56*, 2647-2655.

[11] C. Chen, Y. Wang, J. Li, F. Tian, W. Chen, C. Feng, Y. Pan, Y. Liu, *Appl. Catal. B: Environ. Energy* **2023**, *338*, 123086.

[12] J. Yang, S. Ren, Y. Zhou, Z. Su, L. Yao, J. Cao, L. Jiang, G. Hu, M. Kong, J. Yang, et al., *Chem. Eng. J.* **2020**, *397*, 125446.

[13] Z. Wang, R. Guo, X. Shi, X. Liu, H. Qin, Y. Liu, C. Duan, D. Guo, W. Pan, *Chem. Eng. J.* **2020**, *381*, 122753.

[14] F. Liu, H. He, *Catal. Today*. **2010**, *153*, 70-76.

[15] Z. Lian, F. Liu, H. He, X. Shi, J. Mo, Z. Wu, *Chem. Eng. J.* **2014**, *250*, 390-398.

[16] Z. Chen, S. Ren, X. Xing, X. Li, L. Chen, M. Wang, *Fuel* **2023**, *335*, 126986.

[17] Z. Chen, S. Ren, M. Wang, J. Yang, L. Chen, W. Liu, Q. Liu, B. Su, *Fuel* **2022**, *321*, 124113.

[18] C. Gao, B. Xiao, J. Shi, C. He, B. Wang, D. Ma, Y. Cheng, C. Niu, *J. Catal.* **2019**, *380*, 55-67.

[19] F. Zhao, G. Zhang, Z. Tang, F. Zha, *Fuel* **2022**, *322*, 124185.

[20] Z. Chen, R. Guo, S. Ren, L. Chen, X. Li, M. Wang, *J. Mater. Chem. A* **2022**, *10*, 21474-21491.

[21] Z. Fan, J. Shi, C. Gao, G. Gao, B. Wang, C. Niu, *ACS Appl. Mater. Interfaces* **2017**, *9*, 16117-16127.

[22] X. Tang, C. Wang, F. Gao, Y. Ma, H. Yi, S. Zhao, Y. Zhou, *J. Environ. Chem. Eng.* **2020**, *8*, 104399.

[23] J. Shi, Z. Zhang, M. Chen, Z. Zhang, W. Shangguan, *Fuel* **2017**, *210*, 783-789.

[24] Y. Wei, P. Liang, Y. Li, Y. Zhao, X. Min, P. Tao, J. Hu, T. Sun, *J. Environ. Chem. Eng.* **2022**, *10*, 107772.

[25] X. Huang, N. Fang, S. Wu, F. Dong, Y. Chu, Z. Tang, *Appl. Catal. B: Environ. Energy* **2024**, *343*, 123518.

[26] Y. Wei, W. Li, Q. Wang, M. Liu, P. Liang, L. Wang, T. Sun, *J. Ind. Eng. Chem.* **2023**, *123*, 209-219.

[27] J. Xu, T. Zheng, X. Zou, H. Shen, F. Guo, Q. Zhang, M. Duan, *J. Energy Inst.* **2024**, *112*, 101458.

[28] G. Li, B. Wang, H. Wang, J. Ma, W. Q. Xu, Y. Li, Y. Han, Q. Sun, *Catal. Commun.* **2018**, *108*, 82-87.

[29] L. Li, J. Ji, W. Tan, W. Song, X. Wang, X. Wei, K. Guo, W. Zhang, C. Tang, L. Dong, *J. Rare Earths* **2022**, *40*, 1454-1461.

[30] Y. Ma, W. Liu, Z. Li, Y. Sun, M. Shi, Z. Nan, R. Song, L. Wang, J. Guan, *Molecules* **2023**, *28*,3068*.*
